# Supplementary material for: Alteration of the central core of a DF-PCIC chromophore to boost the photovoltaic applications of non-fullerene acceptor based organic solar cells
Source: Royal Society of Chemistry journal article supplement (doi:10.1039/d2ra08091e), 2023-01-01
Supplement: d2ra08091e1.pdf [file d2ra08091e1.pdf]

## Alteration of the central core of DF-PCIC chromophore to boost the photovoltaic applications of non-fullerene acceptor based organic solar cells

Amna Zahoor<sup>a</sup>, N.M.A. Hadia<sup>b\*</sup>, Sahar Javaid Akram<sup>a</sup>, Rana Farhat Mehmood<sup>c</sup>, Sonia Sadiq<sup>a</sup>, Ahmed M. Shawky<sup>d\*</sup>, Naifa S. Alatawi<sup>e</sup>, Asma Ahmed<sup>f</sup>, Javed Iqbal<sup>a\*</sup>, Rasheed Ahmad Khera<sup>a\*</sup>

<sup>a</sup>Department of Chemistry, University of Agriculture, Faisalabad 38000, Pakistan

<sup>b</sup>Physics Department, College of Science, Jouf University, P.O. Box 2014, Sakaka, Al-Jouf, Saudi Arabia

<sup>c</sup>Department of Chemistry, Division of Science and Technology, University of Education, Township, Lahore 54770, Pakistan

<sup>d</sup>Science and Technology Unit (STU), Umm Al-Qura University, Makkah, 21955, Saudi Arabia

<sup>e</sup>Physics Department, Faculty of Science, University of Tabuk, Tabuk, 71421, Saudi Arabia

<sup>f</sup>Department of Computer Science, Faculty of Computer and Information Technology,  
University of Tabuk, Tabuk, Saudi Arabia

**TableS1:** Frontier molecular orbitals (HOMO-LUMO) and bandgap of the reference attained from all four functionals, along with the experimental values.

| Compounds           | HOMO energy (eV) | LUMO energy (eV) | E <sub>g</sub> (eV) |
|---------------------|------------------|------------------|---------------------|
| Experimental [1, 2] | 5.49             | 3.77             | 1.72                |
| B3LYP               | 5.45             | 3.34             | 2.11                |
| CAMB3LYP            | 6.57             | 2.27             | 4.30                |
| MPW1PW91            | 5.71             | 3.30             | 2.41                |
| WB97XD              | 7.18             | 1.74             | 5.44                |

**Table S2:** Ground state energies of the molecules at MPW1PW91 functional

| Compounds | Energies (hartree fock) |
|-----------|-------------------------|
| R         | -5336.32                |
| M1        | -7343.97                |
| M2        | -7190.35                |
| M3        | -7622.23                |
| M4        | -5366.97                |
| M5        | -6655.13                |

**Table S3:** Values of absorption profile of all the molecules at TD-DFT/MPW1PW91/6-31G+(d,p) in chloroform solvent.

| Compounds | Experimental $\lambda_{\max}$ (nm) | Computed $\lambda_{\max}$ (nm) | Excitation energies $E_x$ (eV) | Oscillator strength ( $f$ ) | Major transition character |
|-----------|------------------------------------|--------------------------------|--------------------------------|-----------------------------|----------------------------|
| <b>R</b>  | 671                                | 659                            | 1.88                           | 3.34                        | HOMO→LUMO                  |
| <b>M1</b> | -                                  | 646                            | 1.91                           | 3.30                        | HOMO→LUMO                  |
| <b>M2</b> | -                                  | 692                            | 1.79                           | 3.52                        | HOMO→LUMO                  |
| <b>M3</b> | -                                  | 693                            | 1.79                           | 3.52                        | HOMO→LUMO                  |
| <b>M4</b> | -                                  | 704                            | 1.76                           | 3.13                        | HOMO→LUMO                  |
| <b>M5</b> | -                                  | 728                            | 1.70                           | 3.80                        | HOMO→LUMO                  |

**Table S4:** Computed results of  $\lambda_{\max}$ , first excitation energy and oscillator strength along with experimental  $\lambda_{\max}$  in gas phase at three different functionals.

| Compounds | Functional     | Computed $\lambda_{\max}$ (nm) | Excitation energies ( $E_x$ ) (eV) | Oscillator strength ( $f$ ) | Major transition character |
|-----------|----------------|--------------------------------|------------------------------------|-----------------------------|----------------------------|
| <b>R</b>  | MPW1PW91       | 613                            | 2.02                               | 3.06                        | HOMO→LUMO                  |
|           | B3LYP          | 656                            | 1.88                               | 2.40                        | HOMO→LUMO                  |
|           | $\omega$ B97XD | 479                            | 2.58                               | 3.20                        | HOMO→LUMO                  |
| <b>M1</b> | MPW1PW91       | 603                            | 2.05                               | 2.96                        | HOMO→LUMO                  |
|           | B3LYP          | 653                            | 1.89                               | 2.40                        | HOMO→LUMO                  |
|           | $\omega$ B97XD | 472                            | 2.62                               | 3.60                        | HOMO→LUMO                  |
| <b>M2</b> | MPW1PW91       | 640                            | 1.94                               | 3.22                        | HOMO→LUMO                  |
|           | B3LYP          | 689                            | 1.79                               | 2.95                        | HOMO→LUMO                  |
|           | $\omega$ B97XD | 486                            | 2.54                               | 3.89                        | HOMO→LUMO                  |
| <b>M3</b> | MPW1PW91       | 640                            | 1.94                               | 3.24                        | HOMO→LUMO                  |
|           | B3LYP          | 691                            | 1.79                               | 3.01                        | HOMO→LUMO                  |
|           | $\omega$ B97XD | 483                            | 2.56                               | 3.84                        | HOMO→LUMO                  |
| <b>M4</b> | MPW1PW91       | 644                            | 1.92                               | 2.90                        | HOMO→LUMO                  |

|           |                |     |      |      |           |
|-----------|----------------|-----|------|------|-----------|
|           | B3LYP          | 685 | 1.80 | 2.71 | HOMO→LUMO |
|           | $\omega$ B97XD | 489 | 2.59 | 3.80 | HOMO→LUMO |
| <b>M5</b> | MPW1PW91       | 681 | 1.82 | 3.49 | HOMO→LUMO |
|           | B3LYP          | 736 | 1.68 | 3.16 | HOMO→LUMO |
|           | $\omega$ B97XD | 500 | 2.47 | 4.33 | HOMO→LUMO |

**Table S5:** Values of vertical excitation energy ( $E_x$ ) according to different methodologies.

| Compounds | $E_x$ (eV)               | $E_x$ (eV)                | $E_x$ (eV)            | $E_x$ (eV) by<br>CIS method |
|-----------|--------------------------|---------------------------|-----------------------|-----------------------------|
|           | MPW1PW91/6-<br>31G (d,p) | MPW1PW91/6-<br>31G+ (d,p) | B3LYP/6-<br>31G (d,p) |                             |
| <b>R</b>  | 1.90                     | 1.88                      | 1.77                  | 2.72                        |
| <b>M1</b> | 1.94                     | 1.91                      | 1.78                  | 2.77                        |
| <b>M2</b> | 1.82                     | 1.79                      | 1.68                  | 2.69                        |
| <b>M3</b> | 1.82                     | 1.79                      | 1.67                  | 2.68                        |
| <b>M4</b> | 1.78                     | 1.76                      | 1.66                  | 2.65                        |
| <b>M5</b> | 1.72                     | 1.71                      | 1.58                  | 2.61                        |

**Table S6:** Frontier molecular orbitals according to three different basis sets.

| Compounds | Basis set | HOMO energy (eV) | LUMO energy (eV) | $E_g$ (eV) |
|-----------|-----------|------------------|------------------|------------|
| <b>R</b>  | 6-31G     | -5.70            | -3.29            | 2.41       |
|           | 6-311G    | -5.90            | -3.47            | 2.43       |
|           | LanL2DZ   | -5.92            | -3.60            | 2.32       |
| <b>M1</b> | 6-31G     | -5.57            | -3.15            | 2.42       |
|           | 6-311G    | -5.76            | -3.31            | 2.45       |
|           | LanL2DZ   | -5.76            | -3.42            | 2.34       |
| <b>M2</b> | 6-31G     | -5.50            | -3.20            | 2.30       |
|           | 6-311G    | -5.68            | -3.38            | 2.30       |
|           | LanL2DZ   | -5.71            | -3.48            | 2.23       |
| <b>M3</b> | 6-31G     | -5.52            | -3.23            | 2.29       |
|           | 6-311G    | -5.70            | -3.31            | 2.39       |

|           |         |       |       |      |
|-----------|---------|-------|-------|------|
|           | LanL2DZ | -5.75 | -3.53 | 2.22 |
| <b>M4</b> | 6-31G   | -5.48 | -3.18 | 2.30 |
|           | 6-311G  | -5.66 | -3.34 | 2.32 |
| <b>M5</b> | LanL2DZ | -5.64 | -3.44 | 2.20 |
|           | 6-31G   | -5.44 | -3.26 | 2.18 |
|           | 6-311G  | -5.61 | -3.42 | 2.19 |
|           | LanL2DZ | -5.69 | -3.53 | 2.16 |

**Table S7:** Dipole moment of **R** and **M1-M6** in gas phase and solvent and their difference.

| Molecule  | $\mu_g$ (Debye) | $\mu_s$ (Debye) | $\Delta\mu$ (Debye) |
|-----------|-----------------|-----------------|---------------------|
| <b>R</b>  | 0.365837        | 0.386188        | 0.020351            |
| <b>M1</b> | 0.917760        | 1.135922        | 0.218162            |
| <b>M2</b> | 1.302373        | 1.695221        | 0.392848            |
| <b>M3</b> | 2.174931        | 2.621592        | 0.446661            |
| <b>M4</b> | 0.175986        | 0.244109        | 0.068123            |
| <b>M5</b> | 0.726893        | 0.922841        | 0.195948            |

Supporting information, Cartesian coordinates of internally optimized geometries of all molecules (reference **R**, and investigated molecules **M1**, **M2**, **M3**, **M4**, and **M5** along X, Y and Z axis at MPW1PW91/6-31G (d, p) level of density functional theory (DFT).

#### Cartesian coordinates of Reference Molecule **R**

| Center Number | Atomic Number | Atomic Type | Coordinates (Angstroms) |           |           |
|---------------|---------------|-------------|-------------------------|-----------|-----------|
|               |               |             | X                       | Y         | Z         |
| 1             | 6             | 0           | 0.972644                | -1.031361 | 0.221152  |
| 2             | 6             | 0           | -0.397988               | -1.172764 | 0.235103  |
| 3             | 6             | 0           | -1.283752               | -0.091669 | 0.099283  |
| 4             | 6             | 0           | -0.676351               | 1.164883  | -0.060681 |

|    |    |   |           |           |           |
|----|----|---|-----------|-----------|-----------|
| 5  | 6  | 0 | 0.693555  | 1.304776  | -0.081212 |
| 6  | 6  | 0 | 1.577691  | 0.224511  | 0.058053  |
| 7  | 1  | 0 | 1.573310  | -1.922963 | 0.356476  |
| 8  | 1  | 0 | -1.273948 | 2.062890  | -0.162881 |
| 9  | 9  | 0 | 1.185898  | 2.543082  | -0.254600 |
| 10 | 9  | 0 | -0.884924 | -2.414028 | 0.392866  |
| 11 | 6  | 0 | -2.728933 | -0.247035 | 0.111398  |
| 12 | 6  | 0 | -3.491757 | -1.326011 | 0.529290  |
| 13 | 6  | 0 | -4.871017 | -1.094841 | 0.397245  |
| 14 | 6  | 0 | -5.158140 | 0.161489  | -0.110741 |
| 15 | 16 | 0 | -3.744068 | 1.067552  | -0.457979 |
| 16 | 1  | 0 | -3.049130 | -2.230794 | 0.917344  |
| 17 | 6  | 0 | -6.352148 | -3.503566 | -1.403479 |
| 18 | 6  | 0 | -7.788290 | -3.248687 | -1.915786 |
| 19 | 6  | 0 | -5.287351 | -2.776442 | -2.236045 |
| 20 | 6  | 0 | -5.232095 | -3.179232 | -3.705763 |
| 21 | 6  | 0 | -8.335622 | -4.289898 | -2.909939 |
| 22 | 6  | 0 | -9.126226 | -5.436363 | -2.272994 |
| 23 | 6  | 0 | -8.331345 | -6.336659 | -1.333694 |
| 24 | 6  | 0 | -7.466608 | -2.548921 | 2.933947  |
| 25 | 6  | 0 | -7.102322 | -3.755756 | 3.821066  |
| 26 | 6  | 0 | -8.219624 | -1.407132 | 3.646565  |
| 27 | 6  | 0 | -9.723109 | -1.589343 | 3.836828  |
| 28 | 6  | 0 | -8.252095 | -4.542326 | 4.473357  |
| 29 | 6  | 0 | -8.518054 | -4.203861 | 5.944393  |
| 30 | 6  | 0 | -7.446766 | -4.735113 | 6.891651  |
| 31 | 6  | 0 | -6.570919 | 0.317970  | -0.199055 |
| 32 | 6  | 0 | -7.181159 | -0.853045 | 0.268744  |
| 33 | 6  | 0 | -8.564170 | -0.742580 | 0.227107  |
| 34 | 6  | 0 | -9.021664 | 0.489160  | -0.274232 |

|    |    |   |            |           |           |
|----|----|---|------------|-----------|-----------|
| 35 | 16 | 0 | -7.664584  | 1.533605  | -0.698744 |
| 36 | 6  | 0 | 3.022554   | 0.382995  | 0.030000  |
| 37 | 6  | 0 | 3.781833   | 1.508989  | 0.300373  |
| 38 | 6  | 0 | 5.161610   | 1.272500  | 0.166255  |
| 39 | 6  | 0 | 5.448283   | -0.035301 | -0.190794 |
| 40 | 16 | 0 | 4.034204   | -0.984522 | -0.397998 |
| 41 | 1  | 0 | 3.336650   | 2.451995  | 0.581775  |
| 42 | 6  | 0 | 7.715717   | 2.907618  | 2.615925  |
| 43 | 6  | 0 | 7.345466   | 4.142807  | 3.456458  |
| 44 | 6  | 0 | 8.435194   | 1.798433  | 3.411115  |
| 45 | 6  | 0 | 9.947191   | 1.945726  | 3.561751  |
| 46 | 6  | 0 | 8.471883   | 4.868904  | 4.185787  |
| 47 | 6  | 0 | 8.011296   | 6.186092  | 4.807253  |
| 48 | 6  | 0 | 9.116264   | 6.904688  | 5.572133  |
| 49 | 6  | 0 | 5.534361   | 3.609045  | -2.749525 |
| 50 | 6  | 0 | 8.081070   | 3.152949  | -2.421308 |
| 51 | 6  | 0 | 8.097718   | 1.811871  | -3.149959 |
| 52 | 6  | 0 | 4.831805   | 2.281362  | -3.035398 |
| 53 | 6  | 0 | 3.743412   | 2.401492  | -4.106957 |
| 54 | 6  | 0 | 2.575642   | 3.306558  | -3.723907 |
| 55 | 6  | 0 | 6.861614   | -0.208701 | -0.237829 |
| 56 | 6  | 0 | 7.471217   | 1.005848  | 0.099697  |
| 57 | 6  | 0 | 8.854206   | 0.893442  | 0.079584  |
| 58 | 6  | 0 | 9.313219   | -0.387603 | -0.275956 |
| 59 | 16 | 0 | 7.957764   | -1.473648 | -0.586208 |
| 60 | 6  | 0 | -10.408258 | 0.742378  | -0.362779 |
| 61 | 6  | 0 | -11.160550 | 1.811981  | -0.791267 |
| 62 | 6  | 0 | -10.624252 | 3.066458  | -1.348483 |
| 63 | 6  | 0 | -12.616265 | 1.905464  | -0.799315 |
| 64 | 6  | 0 | -11.786588 | 3.902272  | -1.708479 |

|    |   |   |            |           |           |
|----|---|---|------------|-----------|-----------|
| 65 | 6 | 0 | -12.968512 | 3.218799  | -1.389504 |
| 66 | 6 | 0 | -14.196320 | 3.827965  | -1.651216 |
| 67 | 6 | 0 | -14.197923 | 5.099551  | -2.223373 |
| 68 | 6 | 0 | -13.011743 | 5.766723  | -2.533709 |
| 69 | 6 | 0 | -11.783432 | 5.164806  | -2.275033 |
| 70 | 1 | 0 | -15.136903 | 3.345632  | -1.425977 |
| 71 | 1 | 0 | -15.148606 | 5.578464  | -2.430466 |
| 72 | 1 | 0 | -13.051544 | 6.755393  | -2.977455 |
| 73 | 1 | 0 | -10.842195 | 5.652167  | -2.502849 |
| 74 | 6 | 0 | -13.533978 | 0.981949  | -0.342286 |
| 75 | 6 | 0 | -14.943610 | 1.180282  | -0.402915 |
| 76 | 6 | 0 | -13.180449 | -0.266074 | 0.247622  |
| 77 | 7 | 0 | -16.099662 | 1.299493  | -0.433516 |
| 78 | 7 | 0 | -12.922220 | -1.290253 | 0.734871  |
| 79 | 8 | 0 | -9.450900  | 3.370622  | -1.496275 |
| 80 | 6 | 0 | 10.700225  | -0.648857 | -0.334257 |
| 81 | 6 | 0 | 11.453177  | -1.756949 | -0.647824 |
| 82 | 6 | 0 | 10.918283  | -3.063271 | -1.071744 |
| 83 | 6 | 0 | 12.909304  | -1.847036 | -0.654105 |
| 84 | 6 | 0 | 12.081647  | -3.925031 | -1.360305 |
| 85 | 6 | 0 | 13.262893  | -3.209125 | -1.119427 |
| 86 | 6 | 0 | 14.491440  | -3.834833 | -1.334398 |
| 87 | 6 | 0 | 14.494528  | -5.154930 | -1.783236 |
| 88 | 6 | 0 | 13.309053  | -5.853977 | -2.016820 |
| 89 | 6 | 0 | 12.080011  | -5.235884 | -1.803821 |
| 90 | 1 | 0 | 15.431505  | -3.328902 | -1.165911 |
| 91 | 1 | 0 | 15.445801  | -5.646882 | -1.953843 |
| 92 | 1 | 0 | 13.349919  | -6.880107 | -2.365180 |
| 93 | 1 | 0 | 11.139293  | -5.746961 | -1.974700 |
| 94 | 6 | 0 | 13.825900  | -0.882707 | -0.288736 |

|     |   |   |            |           |           |
|-----|---|---|------------|-----------|-----------|
| 95  | 6 | 0 | 15.235938  | -1.081798 | -0.337104 |
| 96  | 6 | 0 | 13.470545  | 0.413012  | 0.185936  |
| 97  | 7 | 0 | 16.392208  | -1.200116 | -0.361918 |
| 98  | 7 | 0 | 13.210811  | 1.476818  | 0.578162  |
| 99  | 8 | 0 | 9.745294   | -3.386299 | -1.175211 |
| 100 | 1 | 0 | 9.554326   | 1.688622  | 0.303852  |
| 101 | 1 | 0 | -9.267010  | -1.505160 | 0.538514  |
| 102 | 6 | 0 | -6.139068  | -1.858607 | 0.741266  |
| 103 | 6 | 0 | -6.188169  | -3.277568 | 0.114236  |
| 104 | 6 | 0 | 6.429440   | 2.060987  | 0.434210  |
| 105 | 6 | 0 | 6.419472   | 2.358402  | 1.971071  |
| 106 | 6 | 0 | 6.540486   | 3.424870  | -0.302019 |
| 107 | 6 | 0 | 6.761594   | 3.687321  | -1.817619 |
| 108 | 6 | 0 | -6.165034  | -2.003130 | 2.294746  |
| 109 | 1 | 0 | -10.968354 | -0.113897 | -0.004637 |
| 110 | 1 | 0 | -5.929620  | -1.025053 | 2.726728  |
| 111 | 1 | 0 | -5.321942  | -2.654005 | 2.553426  |
| 112 | 1 | 0 | -8.123692  | -2.926004 | 2.137331  |
| 113 | 1 | 0 | -7.736590  | -1.215612 | 4.613767  |
| 114 | 1 | 0 | -8.072666  | -0.493109 | 3.060324  |
| 115 | 1 | 0 | -9.973649  | -2.412840 | 4.505868  |
| 116 | 1 | 0 | -10.164500 | -0.682890 | 4.259713  |
| 117 | 1 | 0 | -10.227231 | -1.778048 | 2.883994  |
| 118 | 1 | 0 | -6.521110  | -4.440358 | 3.192559  |
| 119 | 1 | 0 | -6.402604  | -3.412772 | 4.595063  |
| 120 | 1 | 0 | -9.166847  | -4.407113 | 3.886729  |
| 121 | 1 | 0 | -8.026602  | -5.613784 | 4.414678  |
| 122 | 1 | 0 | -8.605933  | -3.118900 | 6.069597  |
| 123 | 1 | 0 | -9.487939  | -4.621912 | 6.236606  |
| 124 | 1 | 0 | -7.383160  | -5.826329 | 6.838920  |



|     |   |   |           |           |           |
|-----|---|---|-----------|-----------|-----------|
| 125 | 1 | 0 | -6.456358 | -4.337299 | 6.651545  |
| 126 | 1 | 0 | -7.664199 | -4.464550 | 7.928152  |
| 127 | 1 | 0 | -5.259804 | -3.768043 | 0.432998  |
| 128 | 1 | 0 | -6.995032 | -3.826244 | 0.612358  |
| 129 | 1 | 0 | -6.158934 | -4.578484 | -1.524279 |
| 130 | 1 | 0 | -8.478505 | -3.206161 | -1.065248 |
| 131 | 1 | 0 | -7.830442 | -2.253007 | -2.370349 |
| 132 | 1 | 0 | -8.997083 | -3.785755 | -3.623006 |
| 133 | 1 | 0 | -7.515738 | -4.706320 | -3.505547 |
| 134 | 1 | 0 | -9.982971 | -5.016282 | -1.731350 |
| 135 | 1 | 0 | -9.551419 | -6.050169 | -3.075316 |
| 136 | 1 | 0 | -7.960880 | -5.790804 | -0.461526 |
| 137 | 1 | 0 | -8.950631 | -7.157333 | -0.961804 |
| 138 | 1 | 0 | -7.467463 | -6.778274 | -1.840492 |
| 139 | 1 | 0 | 5.641405  | 3.985477  | -0.014984 |
| 140 | 1 | 0 | 7.368072  | 3.944580  | 0.193815  |
| 141 | 1 | 0 | 6.939736  | 4.771522  | -1.778360 |
| 142 | 1 | 0 | 5.851728  | 4.038863  | -3.710381 |
| 143 | 1 | 0 | 4.789897  | 4.311013  | -2.353841 |
| 144 | 1 | 0 | 5.551684  | 1.525842  | -3.355300 |
| 145 | 1 | 0 | 4.374888  | 1.898732  | -2.120273 |
| 146 | 1 | 0 | 4.190680  | 2.759147  | -5.043281 |
| 147 | 1 | 0 | 3.359197  | 1.397780  | -4.320818 |
| 148 | 1 | 0 | 2.139205  | 3.004236  | -2.767190 |
| 149 | 1 | 0 | 2.881825  | 4.351901  | -3.630433 |
| 150 | 1 | 0 | 1.784998  | 3.268313  | -4.478062 |
| 151 | 1 | 0 | 8.836215  | 3.141722  | -1.627109 |
| 152 | 1 | 0 | 8.432011  | 3.907621  | -3.135331 |
| 153 | 1 | 0 | 7.548672  | 1.862810  | -4.093245 |
| 154 | 1 | 0 | 9.127523  | 1.536570  | -3.394206 |

|     |   |   |           |           |           |
|-----|---|---|-----------|-----------|-----------|
| 155 | 1 | 0 | 7.672875  | 0.999969  | -2.558131 |
| 156 | 1 | 0 | 6.126522  | 1.438733  | 2.487822  |
| 157 | 1 | 0 | 5.597251  | 3.065000  | 2.133578  |
| 158 | 1 | 0 | 8.399429  | 3.244938  | 1.824161  |
| 159 | 1 | 0 | 6.847962  | 4.860129  | 2.789835  |
| 160 | 1 | 0 | 6.583538  | 3.843786  | 4.189999  |
| 161 | 1 | 0 | 8.879531  | 4.230590  | 4.977355  |
| 162 | 1 | 0 | 9.299556  | 5.066960  | 3.492488  |
| 163 | 1 | 0 | 7.624538  | 6.841715  | 4.017232  |
| 164 | 1 | 0 | 7.165650  | 5.992269  | 5.478759  |
| 165 | 1 | 0 | 9.963699  | 7.134717  | 4.919368  |
| 166 | 1 | 0 | 8.761292  | 7.846115  | 5.999213  |
| 167 | 1 | 0 | 9.492894  | 6.288691  | 6.394240  |
| 168 | 1 | 0 | 7.965980  | 1.717380  | 4.400660  |
| 169 | 1 | 0 | 8.243287  | 0.840700  | 2.915359  |
| 170 | 1 | 0 | 10.361689 | 1.090071  | 4.101438  |
| 171 | 1 | 0 | 10.444562 | 1.983202  | 2.588047  |
| 172 | 1 | 0 | 10.236161 | 2.845741  | 4.105424  |
| 173 | 1 | 0 | 11.259631 | 0.241713  | -0.071210 |
| 174 | 1 | 0 | -5.456028 | -1.695940 | -2.171455 |
| 175 | 1 | 0 | -4.304460 | -2.955710 | -1.784844 |
| 176 | 1 | 0 | -5.065021 | -4.254873 | -3.820912 |
| 177 | 1 | 0 | -6.154907 | -2.926995 | -4.234274 |
| 178 | 1 | 0 | -4.414232 | -2.662583 | -4.214899 |

-----  
**Cartesian coordinates of Designed Molecule M1**  
-----

| Center<br>Number | Atomic<br>Number | Atomic<br>Type | Coordinates (Angstroms) |   |   |
|------------------|------------------|----------------|-------------------------|---|---|
|                  |                  |                | X                       | Y | Z |

-----

|    |    |   |            |           |           |
|----|----|---|------------|-----------|-----------|
| 1  | 6  | 0 | -6.044489  | 0.718290  | 0.258699  |
| 2  | 6  | 0 | -7.445556  | 0.646980  | 0.206029  |
| 3  | 6  | 0 | -7.906914  | -0.633429 | -0.061940 |
| 4  | 16 | 0 | -6.629458  | -1.770711 | -0.224375 |
| 5  | 1  | 0 | -5.471124  | 1.609011  | 0.481385  |
| 6  | 6  | 0 | -8.906314  | 1.830484  | 3.000422  |
| 7  | 6  | 0 | -10.407741 | 1.525517  | 3.193880  |
| 8  | 6  | 0 | -8.011191  | 0.632370  | 3.338139  |
| 9  | 6  | 0 | -8.122514  | 0.130077  | 4.773275  |
| 10 | 6  | 0 | -10.956432 | 1.755057  | 4.616054  |
| 11 | 6  | 0 | -11.586233 | 3.131855  | 4.844474  |
| 12 | 6  | 0 | -10.611387 | 4.302251  | 4.778160  |
| 13 | 6  | 0 | -9.611437  | 3.588055  | -1.176329 |
| 14 | 6  | 0 | -9.032301  | 5.013514  | -1.281856 |
| 15 | 6  | 0 | -10.405338 | 3.097013  | -2.402406 |
| 16 | 6  | 0 | -11.881899 | 3.477874  | -2.455323 |
| 17 | 6  | 0 | -9.996639  | 6.197384  | -1.449693 |
| 18 | 6  | 0 | -10.238610 | 6.645489  | -2.894907 |
| 19 | 6  | 0 | -9.027928  | 7.309303  | -3.542214 |
| 20 | 6  | 0 | -9.329316  | -0.613345 | -0.121389 |
| 21 | 6  | 0 | -9.768990  | 0.697901  | 0.106521  |
| 22 | 6  | 0 | -11.151240 | 0.780810  | 0.029820  |
| 23 | 6  | 0 | -11.781764 | -0.450943 | -0.225296 |
| 24 | 16 | 0 | -10.586214 | -1.737883 | -0.403301 |
| 25 | 6  | 0 | 6.379814   | -1.026499 | -0.472436 |
| 26 | 6  | 0 | 7.757601   | -0.879161 | -0.239617 |
| 27 | 6  | 0 | 8.131407   | 0.447418  | -0.076308 |
| 28 | 16 | 0 | 6.793272   | 1.521241  | -0.139305 |
| 29 | 1  | 0 | 5.875323   | -1.965289 | -0.662023 |
| 30 | 6  | 0 | 10.320045  | -3.045077 | -2.219152 |

|    |    |   |            |           |           |
|----|----|---|------------|-----------|-----------|
| 31 | 6  | 0 | 9.923481   | -4.414010 | -2.800987 |
| 32 | 6  | 0 | 11.102062  | -2.142429 | -3.195147 |
| 33 | 6  | 0 | 12.616816  | -2.330537 | -3.232283 |
| 34 | 6  | 0 | 11.033154  | -5.331625 | -3.302126 |
| 35 | 6  | 0 | 10.510894  | -6.707942 | -3.710891 |
| 36 | 6  | 0 | 11.604795  | -7.629160 | -4.237099 |
| 37 | 6  | 0 | 7.660422   | -2.950686 | 3.011015  |
| 38 | 6  | 0 | 10.152249  | -2.221097 | 2.887590  |
| 39 | 6  | 0 | 9.924345   | -0.773235 | 3.314506  |
| 40 | 6  | 0 | 6.754119   | -1.720937 | 2.956644  |
| 41 | 6  | 0 | 5.614153   | -1.781704 | 3.976766  |
| 42 | 6  | 0 | 4.585315   | -2.877962 | 3.719781  |
| 43 | 6  | 0 | 9.548378   | 0.525759  | 0.029551  |
| 44 | 6  | 0 | 10.073957  | -0.769972 | -0.057095 |
| 45 | 6  | 0 | 11.457971  | -0.754903 | 0.027611  |
| 46 | 6  | 0 | 12.003331  | 0.533296  | 0.180203  |
| 47 | 16 | 0 | 10.725455  | 1.749844  | 0.228705  |
| 48 | 6  | 0 | -13.188206 | -0.515529 | -0.318710 |
| 49 | 6  | 0 | -14.089048 | -1.529110 | -0.558596 |
| 50 | 6  | 0 | -13.744989 | -2.945049 | -0.776933 |
| 51 | 6  | 0 | -15.539565 | -1.405188 | -0.636264 |
| 52 | 6  | 0 | -15.020866 | -3.674748 | -0.922418 |
| 53 | 6  | 0 | -16.086918 | -2.767214 | -0.840135 |
| 54 | 6  | 0 | -17.587047 | -4.608378 | -1.161948 |
| 55 | 6  | 0 | -16.514621 | -5.498004 | -1.245467 |
| 56 | 6  | 0 | -15.208457 | -5.031520 | -1.118241 |
| 57 | 1  | 0 | -18.600272 | -4.984599 | -1.251009 |
| 58 | 1  | 0 | -16.703203 | -6.554448 | -1.401476 |
| 59 | 1  | 0 | -14.351080 | -5.692867 | -1.172638 |
| 60 | 6  | 0 | -16.309169 | -0.263353 | -0.545660 |

|    |   |   |            |           |           |
|----|---|---|------------|-----------|-----------|
| 61 | 6 | 0 | -17.731292 | -0.269077 | -0.632660 |
| 62 | 6 | 0 | -15.777073 | 1.045731  | -0.362378 |
| 63 | 7 | 0 | -18.891594 | -0.234731 | -0.697869 |
| 64 | 7 | 0 | -15.374743 | 2.127133  | -0.214633 |
| 65 | 8 | 0 | -12.628435 | -3.435800 | -0.846896 |
| 66 | 6 | 0 | 13.403173  | 0.700995  | 0.247783  |
| 67 | 6 | 0 | 14.235344  | 1.789451  | 0.383183  |
| 68 | 6 | 0 | 13.798377  | 3.187317  | 0.550993  |
| 69 | 6 | 0 | 15.692672  | 1.770548  | 0.418543  |
| 70 | 6 | 0 | 15.023119  | 4.000742  | 0.695497  |
| 71 | 6 | 0 | 16.146720  | 3.165573  | 0.622031  |
| 72 | 6 | 0 | 17.418943  | 3.725474  | 0.738770  |
| 73 | 6 | 0 | 17.522618  | 5.103492  | 0.925017  |
| 74 | 6 | 0 | 16.393782  | 5.921899  | 0.994340  |
| 75 | 6 | 0 | 15.121156  | 5.368936  | 0.878732  |
| 76 | 1 | 0 | 18.317296  | 3.125888  | 0.690850  |
| 77 | 1 | 0 | 18.508373  | 5.545866  | 1.018195  |
| 78 | 1 | 0 | 16.512847  | 6.989978  | 1.139138  |
| 79 | 1 | 0 | 14.222068  | 5.972810  | 0.926907  |
| 80 | 6 | 0 | 16.540550  | 0.692560  | 0.268001  |
| 81 | 6 | 0 | 17.960101  | 0.802143  | 0.319762  |
| 82 | 6 | 0 | 16.100552  | -0.642006 | 0.032112  |
| 83 | 7 | 0 | 19.120656  | 0.858955  | 0.359480  |
| 84 | 7 | 0 | 15.769758  | -1.740347 | -0.161034 |
| 85 | 8 | 0 | 12.651917  | 3.605959  | 0.601893  |
| 86 | 1 | 0 | 12.102877  | -1.623755 | -0.017967 |
| 87 | 1 | 0 | -11.736874 | 1.681886  | 0.163837  |
| 88 | 6 | 0 | -8.591684  | 1.638640  | 0.315170  |
| 89 | 6 | 0 | -8.573861  | 2.460818  | 1.630580  |
| 90 | 6 | 0 | 8.970508   | -1.789877 | -0.275288 |

|     |   |   |            |           |           |
|-----|---|---|------------|-----------|-----------|
| 91  | 6 | 0 | 9.024694   | -2.339605 | -1.743253 |
| 92  | 6 | 0 | 8.945001   | -3.011953 | 0.683620  |
| 93  | 6 | 0 | 8.995981   | -3.012212 | 2.236679  |
| 94  | 6 | 0 | -8.434837  | 2.624184  | -0.886006 |
| 95  | 1 | 0 | -13.617512 | 0.468046  | -0.165616 |
| 96  | 1 | 0 | -8.221795  | 2.033820  | -1.783457 |
| 97  | 1 | 0 | -7.523997  | 3.199361  | -0.683435 |
| 98  | 1 | 0 | -10.296940 | 3.578375  | -0.316516 |
| 99  | 1 | 0 | -9.892130  | 3.427830  | -3.314957 |
| 100 | 1 | 0 | -10.350155 | 2.002982  | -2.418694 |
| 101 | 1 | 0 | -12.043230 | 4.551746  | -2.548041 |
| 102 | 1 | 0 | -12.367257 | 3.001072  | -3.311057 |
| 103 | 1 | 0 | -12.412662 | 3.144968  | -1.557761 |
| 104 | 1 | 0 | -8.444983  | 5.173358  | -0.369716 |
| 105 | 1 | 0 | -8.297984  | 5.021344  | -2.098683 |
| 106 | 1 | 0 | -10.952067 | 5.968544  | -0.965223 |
| 107 | 1 | 0 | -9.592282  | 7.056459  | -0.900564 |
| 108 | 1 | 0 | -10.551193 | 5.792958  | -3.507674 |
| 109 | 1 | 0 | -11.078333 | 7.349546  | -2.908500 |
| 110 | 1 | 0 | -8.723686  | 8.204202  | -2.989941 |
| 111 | 1 | 0 | -8.164392  | 6.638602  | -3.579647 |
| 112 | 1 | 0 | -9.247443  | 7.612387  | -4.569212 |
| 113 | 1 | 0 | -7.568650  | 2.897260  | 1.691488  |
| 114 | 1 | 0 | -9.252130  | 3.310013  | 1.492717  |
| 115 | 1 | 0 | -8.650263  | 2.622282  | 3.718817  |
| 116 | 1 | 0 | -10.995504 | 2.140342  | 2.502597  |
| 117 | 1 | 0 | -10.601720 | 0.490452  | 2.893019  |
| 118 | 1 | 0 | -11.716848 | 0.996579  | 4.830993  |
| 119 | 1 | 0 | -10.164144 | 1.599298  | 5.356982  |
| 120 | 1 | 0 | -12.389381 | 3.283472  | 4.112622  |

|     |   |   |            |           |           |
|-----|---|---|------------|-----------|-----------|
| 121 | 1 | 0 | -12.072049 | 3.133392  | 5.826959  |
| 122 | 1 | 0 | -10.144649 | 4.388061  | 3.792761  |
| 123 | 1 | 0 | -11.118334 | 5.249698  | 4.979329  |
| 124 | 1 | 0 | -9.809901  | 4.192323  | 5.515440  |
| 125 | 1 | 0 | 8.068043   | -3.606237 | 0.396017  |
| 126 | 1 | 0 | 9.807616   | -3.613993 | 0.378537  |
| 127 | 1 | 0 | 9.293814   | -4.057668 | 2.400798  |
| 128 | 1 | 0 | 7.914205   | -3.138850 | 4.064222  |
| 129 | 1 | 0 | 7.072349   | -3.824783 | 2.701662  |
| 130 | 1 | 0 | 7.327517   | -0.809447 | 3.134892  |
| 131 | 1 | 0 | 6.327312   | -1.618866 | 1.956655  |
| 132 | 1 | 0 | 6.040469   | -1.913398 | 4.979760  |
| 133 | 1 | 0 | 5.104102   | -0.812035 | 3.990801  |
| 134 | 1 | 0 | 4.112490   | -2.750197 | 2.740538  |
| 135 | 1 | 0 | 5.033420   | -3.874907 | 3.745269  |
| 136 | 1 | 0 | 3.791740   | -2.857057 | 4.471168  |
| 137 | 1 | 0 | 11.018698  | -2.266669 | 2.218606  |
| 138 | 1 | 0 | 10.454510  | -2.778832 | 3.782163  |
| 139 | 1 | 0 | 9.230317   | -0.706599 | 4.155904  |
| 140 | 1 | 0 | 10.868354  | -0.330572 | 3.643709  |
| 141 | 1 | 0 | 9.533774   | -0.151111 | 2.508068  |
| 142 | 1 | 0 | 8.808681   | -1.503996 | -2.416599 |
| 143 | 1 | 0 | 8.174378   | -3.025053 | -1.838252 |
| 144 | 1 | 0 | 10.966483  | -3.231556 | -1.350112 |
| 145 | 1 | 0 | 9.359307   | -4.950126 | -2.025816 |
| 146 | 1 | 0 | 9.209202   | -4.243540 | -3.619085 |
| 147 | 1 | 0 | 11.535998  | -4.878445 | -4.163236 |
| 148 | 1 | 0 | 11.799042  | -5.453056 | -2.524965 |
| 149 | 1 | 0 | 10.016820  | -7.177576 | -2.851368 |
| 150 | 1 | 0 | 9.733611   | -6.586272 | -4.475529 |

|     |   |   |            |           |           |
|-----|---|---|------------|-----------|-----------|
| 151 | 1 | 0 | 12.380447  | -7.792508 | -3.482898 |
| 152 | 1 | 0 | 11.205100  | -8.606651 | -4.518914 |
| 153 | 1 | 0 | 12.090135  | -7.202278 | -5.119903 |
| 154 | 1 | 0 | 10.681947  | -2.263824 | -4.202677 |
| 155 | 1 | 0 | 10.910967  | -1.098984 | -2.922820 |
| 156 | 1 | 0 | 13.070597  | -1.617041 | -3.925403 |
| 157 | 1 | 0 | 13.064868  | -2.152804 | -2.250245 |
| 158 | 1 | 0 | 12.918277  | -3.329231 | -3.548853 |
| 159 | 1 | 0 | 13.897733  | -0.260666 | 0.170908  |
| 160 | 1 | 0 | -8.242195  | -0.192441 | 2.655282  |
| 161 | 1 | 0 | -6.967715  | 0.904244  | 3.139648  |
| 162 | 1 | 0 | -7.888296  | 0.919181  | 5.494712  |
| 163 | 1 | 0 | -9.125033  | -0.241596 | 5.000714  |
| 164 | 1 | 0 | -7.423300  | -0.692311 | 4.945835  |
| 165 | 6 | 0 | -17.393064 | -3.242291 | -0.956733 |
| 166 | 1 | 0 | -18.250817 | -2.587373 | -0.894385 |
| 167 | 6 | 0 | -5.443688  | -0.509817 | 0.038129  |
| 168 | 6 | 0 | 5.705434   | 0.183290  | -0.443583 |
| 169 | 6 | 0 | 1.975566   | 0.030590  | -0.506613 |
| 170 | 6 | 0 | 2.010788   | 1.358720  | -0.960644 |
| 171 | 6 | 0 | 0.834376   | 2.111345  | -1.202441 |
| 172 | 6 | 0 | -0.371605  | 1.480910  | -0.953696 |
| 173 | 6 | 0 | -0.462335  | 0.149230  | -0.489336 |
| 174 | 6 | 0 | 0.717906   | -0.608414 | -0.265430 |
| 175 | 6 | 0 | 3.282291   | -0.489005 | -0.280831 |
| 176 | 6 | 0 | 4.284949   | 0.397470  | -0.575472 |
| 177 | 1 | 0 | -1.285340  | 2.030734  | -1.146515 |
| 178 | 1 | 0 | 3.484254   | -1.468603 | 0.131604  |
| 179 | 6 | 0 | -1.724016  | -0.478853 | -0.237595 |
| 180 | 6 | 0 | -1.759765  | -1.815163 | 0.186025  |



|     |    |   |           |           |           |
|-----|----|---|-----------|-----------|-----------|
| 181 | 6  | 0 | -0.582086 | -2.579934 | 0.389862  |
| 182 | 6  | 0 | 0.627214  | -1.951133 | 0.168959  |
| 183 | 6  | 0 | -3.028581 | 0.082404  | -0.334978 |
| 184 | 6  | 0 | -4.027800 | -0.789479 | 0.010616  |
| 185 | 1  | 0 | 1.533221  | -2.526825 | 0.314908  |
| 186 | 1  | 0 | -3.238229 | 1.088293  | -0.673616 |
| 187 | 16 | 0 | 3.644830  | 1.923833  | -1.138609 |
| 188 | 16 | 0 | -3.388628 | -2.348258 | 0.477921  |
| 189 | 6  | 0 | 0.880118  | 3.494849  | -1.677913 |
| 190 | 6  | 0 | 1.718897  | 4.071515  | -2.601739 |
| 191 | 16 | 0 | -0.248184 | 4.672476  | -1.075201 |
| 192 | 6  | 0 | 1.445126  | 5.445981  | -2.829215 |
| 193 | 1  | 0 | 2.484409  | 3.519171  | -3.131117 |
| 194 | 6  | 0 | 0.402115  | 5.906638  | -2.078571 |
| 195 | 1  | 0 | 1.994857  | 6.063345  | -3.527861 |
| 196 | 1  | 0 | -0.014338 | 6.902683  | -2.049021 |
| 197 | 6  | 0 | -0.640932 | -3.973204 | 0.847177  |
| 198 | 6  | 0 | -1.489335 | -4.977239 | 0.447905  |
| 199 | 16 | 0 | 0.484799  | -4.561918 | 2.027546  |
| 200 | 6  | 0 | -1.227001 | -6.216477 | 1.089595  |
| 201 | 1  | 0 | -2.255690 | -4.829533 | -0.301821 |
| 202 | 6  | 0 | -0.187445 | -6.143340 | 1.971906  |
| 203 | 1  | 0 | -1.784040 | -7.125599 | 0.902810  |
| 204 | 1  | 0 | 0.213822  | -6.926025 | 2.598601  |

-----

**Cartesian coordinates of Designed Molecule M2**

-----

| Center<br>Number | Atomic<br>Number | Atomic<br>Type | Coordinates (Angstroms) |   |   |
|------------------|------------------|----------------|-------------------------|---|---|
|                  |                  |                | X                       | Y | Z |

-----

|    |    |   |           |           |           |
|----|----|---|-----------|-----------|-----------|
| 1  | 6  | 0 | 5.570483  | -1.287020 | 0.155457  |
| 2  | 6  | 0 | 6.948567  | -1.036717 | 0.092568  |
| 3  | 6  | 0 | 7.244645  | 0.316906  | 0.013990  |
| 4  | 16 | 0 | 5.836458  | 1.298649  | 0.028432  |
| 5  | 1  | 0 | 5.119771  | -2.268302 | 0.227780  |
| 6  | 6  | 0 | 8.610193  | -2.496539 | 2.617693  |
| 7  | 6  | 0 | 10.070052 | -2.056445 | 2.866091  |
| 8  | 6  | 0 | 7.582803  | -1.487400 | 3.148783  |
| 9  | 6  | 0 | 7.633186  | -1.234939 | 4.652026  |
| 10 | 6  | 0 | 10.701365 | -2.551501 | 4.181589  |
| 11 | 6  | 0 | 11.520369 | -3.838537 | 4.052159  |
| 12 | 6  | 0 | 10.726969 | -5.070743 | 3.631132  |
| 13 | 6  | 0 | 9.388824  | -3.430391 | -1.801430 |
| 14 | 6  | 0 | 8.977833  | -4.882239 | -2.116354 |
| 15 | 6  | 0 | 10.080388 | -2.671625 | -2.952384 |
| 16 | 6  | 0 | 11.572111 | -2.931375 | -3.145673 |
| 17 | 6  | 0 | 10.082285 | -5.876059 | -2.511491 |
| 18 | 6  | 0 | 10.240382 | -6.103230 | -4.019492 |
| 19 | 6  | 0 | 9.113193  | -6.931820 | -4.628068 |
| 20 | 6  | 0 | 8.655171  | 0.481920  | -0.069515 |
| 21 | 6  | 0 | 9.257094  | -0.783963 | -0.052792 |
| 22 | 6  | 0 | 10.636202 | -0.680644 | -0.154691 |
| 23 | 6  | 0 | 11.103498 | 0.643768  | -0.240315 |
| 24 | 16 | 0 | 9.757198  | 1.784399  | -0.195364 |
| 25 | 6  | 0 | -5.815223 | 1.389526  | 0.214644  |
| 26 | 6  | 0 | -7.195738 | 1.142374  | 0.193235  |
| 27 | 6  | 0 | -7.497978 | -0.207517 | 0.080772  |
| 28 | 16 | 0 | -6.092218 | -1.191408 | 0.029772  |
| 29 | 1  | 0 | -5.361752 | 2.368963  | 0.292697  |
| 30 | 6  | 0 | -9.630957 | 3.553923  | -1.666152 |

|    |    |   |            |           |           |
|----|----|---|------------|-----------|-----------|
| 31 | 6  | 0 | -9.214173  | 4.991576  | -2.024797 |
| 32 | 6  | 0 | -10.324101 | 2.797265  | -2.818932 |
| 33 | 6  | 0 | -11.828658 | 3.015281  | -2.960291 |
| 34 | 6  | 0 | -10.302434 | 5.946388  | -2.506314 |
| 35 | 6  | 0 | -9.800060  | 7.382482  | -2.642252 |
| 36 | 6  | 0 | -10.867532 | 8.343837  | -3.150711 |
| 37 | 6  | 0 | -7.690034  | 2.319774  | 3.694719  |
| 38 | 6  | 0 | -10.231889 | 2.102028  | 3.134962  |
| 39 | 6  | 0 | -10.314680 | 0.593943  | 3.358436  |
| 40 | 6  | 0 | -7.047814  | 0.937828  | 3.560071  |
| 41 | 6  | 0 | -5.998212  | 0.663219  | 4.642345  |
| 42 | 6  | 0 | -4.758040  | 1.549127  | 4.565120  |
| 43 | 6  | 0 | -8.909982  | -0.364704 | -0.000294 |
| 44 | 6  | 0 | -9.504967  | 0.902782  | 0.062653  |
| 45 | 6  | 0 | -10.885823 | 0.812290  | -0.018967 |
| 46 | 6  | 0 | -11.361947 | -0.506390 | -0.140736 |
| 47 | 16 | 0 | -10.022113 | -1.655267 | -0.154254 |
| 48 | 6  | 0 | 12.487489  | 0.894036  | -0.351885 |
| 49 | 6  | 0 | 13.251033  | 2.035793  | -0.448430 |
| 50 | 6  | 0 | 12.733844  | 3.415198  | -0.431088 |
| 51 | 6  | 0 | 14.702503  | 2.103101  | -0.563119 |
| 52 | 6  | 0 | 13.906437  | 4.309012  | -0.518148 |
| 53 | 6  | 0 | 15.074940  | 3.537803  | -0.590686 |
| 54 | 6  | 0 | 16.331898  | 5.576197  | -0.680934 |
| 55 | 6  | 0 | 15.158776  | 6.329562  | -0.610400 |
| 56 | 6  | 0 | 13.923451  | 5.692876  | -0.527506 |
| 57 | 1  | 0 | 17.288136  | 6.083841  | -0.744000 |
| 58 | 1  | 0 | 15.214371  | 7.412527  | -0.619952 |
| 59 | 1  | 0 | 12.991960  | 6.244624  | -0.470232 |
| 60 | 6  | 0 | 15.602539  | 1.060118  | -0.648463 |

|    |   |   |            |           |           |
|----|---|---|------------|-----------|-----------|
| 61 | 6 | 0 | 17.011067  | 1.245363  | -0.755476 |
| 62 | 6 | 0 | 15.229017  | -0.314855 | -0.648329 |
| 63 | 7 | 0 | 18.165786  | 1.349092  | -0.842542 |
| 64 | 7 | 0 | 14.954669  | -1.445327 | -0.652544 |
| 65 | 8 | 0 | 11.567496  | 3.769916  | -0.358617 |
| 66 | 6 | 0 | -12.748849 | -0.747018 | -0.240966 |
| 67 | 6 | 0 | -13.518417 | -1.881747 | -0.366007 |
| 68 | 6 | 0 | -13.006586 | -3.262892 | -0.404082 |
| 69 | 6 | 0 | -14.971800 | -1.940042 | -0.463404 |
| 70 | 6 | 0 | -14.183632 | -4.149034 | -0.506225 |
| 71 | 6 | 0 | -15.350003 | -3.371596 | -0.536523 |
| 72 | 6 | 0 | -16.588249 | -4.008088 | -0.625993 |
| 73 | 6 | 0 | -16.615832 | -5.401119 | -0.683557 |
| 74 | 6 | 0 | -15.445008 | -6.160437 | -0.654805 |
| 75 | 6 | 0 | -14.206215 | -5.531417 | -0.564750 |
| 76 | 1 | 0 | -17.517404 | -3.456570 | -0.650624 |
| 77 | 1 | 0 | -17.574829 | -5.902729 | -0.752651 |
| 78 | 1 | 0 | -15.504772 | -7.242164 | -0.702481 |
| 79 | 1 | 0 | -13.276350 | -6.088231 | -0.539278 |
| 80 | 6 | 0 | -15.869031 | -0.891834 | -0.499953 |
| 81 | 6 | 0 | -17.279419 | -1.068781 | -0.595999 |
| 82 | 6 | 0 | -15.490740 | 0.481051  | -0.454941 |
| 83 | 7 | 0 | -18.435451 | -1.165838 | -0.672557 |
| 84 | 7 | 0 | -15.212409 | 1.609998  | -0.421599 |
| 85 | 8 | 0 | -11.840913 | -3.623920 | -0.356728 |
| 86 | 1 | 0 | -11.575107 | 1.646823  | 0.011068  |
| 87 | 1 | 0 | 11.331630  | -1.510460 | -0.167605 |
| 88 | 6 | 0 | 8.206587   | -1.885545 | 0.008640  |
| 89 | 6 | 0 | 8.334288   | -2.918608 | 1.159029  |
| 90 | 6 | 0 | -8.449815  | 1.993069  | 0.148973  |

|     |   |   |           |           |           |
|-----|---|---|-----------|-----------|-----------|
| 91  | 6 | 0 | -8.368878 | 2.790746  | -1.194450 |
| 92  | 6 | 0 | -8.591507 | 3.027298  | 1.298925  |
| 93  | 6 | 0 | -8.871508 | 2.759047  | 2.803326  |
| 94  | 6 | 0 | 8.125262  | -2.658984 | -1.344443 |
| 95  | 1 | 0 | 13.036264 | -0.040767 | -0.359608 |
| 96  | 1 | 0 | 7.834109  | -1.945792 | -2.122504 |
| 97  | 1 | 0 | 7.282341  | -3.352856 | -1.246232 |
| 98  | 1 | 0 | 10.101802 | -3.474848 | -0.965820 |
| 99  | 1 | 0 | 9.536725  | -2.871315 | -3.885050 |
| 100 | 1 | 0 | 9.956157  | -1.599133 | -2.766197 |
| 101 | 1 | 0 | 11.793385 | -3.955303 | -3.448189 |
| 102 | 1 | 0 | 11.974860 | -2.270811 | -3.918127 |
| 103 | 1 | 0 | 12.134700 | -2.733392 | -2.228172 |
| 104 | 1 | 0 | 8.469003  | -5.261437 | -1.222480 |
| 105 | 1 | 0 | 8.206947  | -4.858127 | -2.898234 |
| 106 | 1 | 0 | 11.035077 | -5.555635 | -2.077220 |
| 107 | 1 | 0 | 9.865214  | -6.846971 | -2.050473 |
| 108 | 1 | 0 | 10.302019 | -5.140740 | -4.539151 |
| 109 | 1 | 0 | 11.193479 | -6.610425 | -4.206845 |
| 110 | 1 | 0 | 9.069067  | -7.927040 | -4.175072 |
| 111 | 1 | 0 | 8.136349  | -6.461448 | -4.481751 |
| 112 | 1 | 0 | 9.253883  | -7.062451 | -5.704118 |
| 113 | 1 | 0 | 7.398350  | -3.491484 | 1.142389  |
| 114 | 1 | 0 | 9.117500  | -3.629392 | 0.873220  |
| 115 | 1 | 0 | 8.459590  | -3.424357 | 3.187432  |
| 116 | 1 | 0 | 10.700490 | -2.411584 | 2.042714  |
| 117 | 1 | 0 | 10.124628 | -0.963607 | 2.820480  |
| 118 | 1 | 0 | 11.362304 | -1.772239 | 4.576278  |
| 119 | 1 | 0 | 9.924965  | -2.697558 | 4.940408  |
| 120 | 1 | 0 | 12.334377 | -3.670569 | 3.335989  |

|     |   |   |            |           |           |
|-----|---|---|------------|-----------|-----------|
| 121 | 1 | 0 | 12.004878  | -4.040620 | 5.014274  |
| 122 | 1 | 0 | 10.286545  | -4.952090 | 2.636871  |
| 123 | 1 | 0 | 11.366850  | -5.956554 | 3.597535  |
| 124 | 1 | 0 | 9.912460   | -5.277492 | 4.332523  |
| 125 | 1 | 0 | -7.681834  | 3.640424  | 1.253831  |
| 126 | 1 | 0 | -9.398918  | 3.696228  | 0.980697  |
| 127 | 1 | 0 | -9.021271  | 3.796675  | 3.134908  |
| 128 | 1 | 0 | -8.036728  | 2.428834  | 4.732238  |
| 129 | 1 | 0 | -6.904868  | 3.076854  | 3.574330  |
| 130 | 1 | 0 | -7.807243  | 0.155969  | 3.611541  |
| 131 | 1 | 0 | -6.573020  | 0.838235  | 2.581610  |
| 132 | 1 | 0 | -6.460561  | 0.768446  | 5.632144  |
| 133 | 1 | 0 | -5.687564  | -0.384496 | 4.564517  |
| 134 | 1 | 0 | -4.274843  | 1.459176  | 3.586751  |
| 135 | 1 | 0 | -4.996355  | 2.604259  | 4.724400  |
| 136 | 1 | 0 | -4.023949  | 1.264340  | 5.323548  |
| 137 | 1 | 0 | -10.944005 | 2.391431  | 2.353861  |
| 138 | 1 | 0 | -10.603599 | 2.581324  | 4.048512  |
| 139 | 1 | 0 | -9.824414  | 0.301832  | 4.290357  |
| 140 | 1 | 0 | -11.361280 | 0.287421  | 3.437433  |
| 141 | 1 | 0 | -9.865053  | 0.019411  | 2.547667  |
| 142 | 1 | 0 | -8.058898  | 2.093506  | -1.979475 |
| 143 | 1 | 0 | -7.535937  | 3.493501  | -1.075346 |
| 144 | 1 | 0 | -10.347488 | 3.618669  | -0.835407 |
| 145 | 1 | 0 | -8.738805  | 5.430903  | -1.137365 |
| 146 | 1 | 0 | -8.424951  | 4.940345  | -2.788001 |
| 147 | 1 | 0 | -10.689891 | 5.616598  | -3.476627 |
| 148 | 1 | 0 | -11.152120 | 5.925049  | -1.811636 |
| 149 | 1 | 0 | -9.426941  | 7.727965  | -1.670156 |
| 150 | 1 | 0 | -8.937273  | 7.400114  | -3.319744 |

|     |    |   |            |           |           |
|-----|----|---|------------|-----------|-----------|
| 151 | 1  | 0 | -11.728784 | 8.370843  | -2.476409 |
| 152 | 1  | 0 | -10.481392 | 9.362759  | -3.236486 |
| 153 | 1  | 0 | -11.232495 | 8.043179  | -4.137354 |
| 154 | 1  | 0 | -9.818785  | 3.053474  | -3.759580 |
| 155 | 1  | 0 | -10.156099 | 1.724298  | -2.677354 |
| 156 | 1  | 0 | -12.227426 | 2.408001  | -3.777159 |
| 157 | 1  | 0 | -12.362811 | 2.722613  | -2.051586 |
| 158 | 1  | 0 | -12.090620 | 4.053436  | -3.166736 |
| 159 | 1  | 0 | -13.293502 | 0.189645  | -0.208615 |
| 160 | 1  | 0 | 7.712103   | -0.533384 | 2.626611  |
| 161 | 1  | 0 | 6.578488   | -1.840112 | 2.886110  |
| 162 | 1  | 0 | 7.514186   | -2.163092 | 5.219937  |
| 163 | 1  | 0 | 8.575620   | -0.774626 | 4.958853  |
| 164 | 1  | 0 | 6.828679   | -0.558846 | 4.953170  |
| 165 | 6  | 0 | 16.309850  | 4.181973  | -0.673078 |
| 166 | 1  | 0 | 17.240378  | 3.635072  | -0.729213 |
| 167 | 6  | 0 | 4.817857   | -0.121688 | 0.136204  |
| 168 | 6  | 0 | -5.066564  | 0.223357  | 0.145138  |
| 169 | 6  | 0 | 1.117765   | -0.598009 | 0.138251  |
| 170 | 6  | 0 | 1.014776   | 0.814599  | 0.270560  |
| 171 | 6  | 0 | -0.202324  | 1.488482  | 0.340404  |
| 172 | 6  | 0 | -1.365847  | 0.692641  | 0.246400  |
| 173 | 6  | 0 | -1.262886  | -0.720304 | 0.118270  |
| 174 | 6  | 0 | -0.045782  | -1.396474 | 0.073199  |
| 175 | 6  | 0 | 2.474072   | -1.029151 | 0.075119  |
| 176 | 6  | 0 | 3.381752   | -0.009932 | 0.181126  |
| 177 | 1  | 0 | 2.751160   | -2.064352 | -0.069680 |
| 178 | 6  | 0 | -2.722500  | 1.126967  | 0.258769  |
| 179 | 6  | 0 | -3.630166  | 0.105943  | 0.170588  |
| 180 | 16 | 0 | -2.844200  | -1.459997 | 0.064513  |

|     |    |   |           |           |           |
|-----|----|---|-----------|-----------|-----------|
| 181 | 16 | 0 | 2.596922  | 1.548964  | 0.367116  |
| 182 | 6  | 0 | 0.054465  | -2.858032 | -0.020366 |
| 183 | 6  | 0 | 0.709113  | -3.706487 | 0.838443  |
| 184 | 16 | 0 | -0.657221 | -3.756008 | -1.328878 |
| 185 | 6  | 0 | 0.630734  | -5.070476 | 0.451688  |
| 186 | 1  | 0 | 1.205685  | -3.352684 | 1.733672  |
| 187 | 6  | 0 | -0.078645 | -5.247157 | -0.701471 |
| 188 | 1  | 0 | 1.072806  | -5.885370 | 1.010354  |
| 189 | 1  | 0 | -0.298906 | -6.170294 | -1.217259 |
| 190 | 6  | 0 | -0.301958 | 2.942269  | 0.518303  |
| 191 | 6  | 0 | -0.963378 | 3.618243  | 1.514173  |
| 192 | 6  | 0 | -0.880556 | 5.030069  | 1.388540  |
| 193 | 6  | 0 | -0.159831 | 5.415913  | 0.294877  |
| 194 | 16 | 0 | 0.422467  | 4.065839  | -0.593827 |
| 195 | 1  | 0 | -1.326632 | 5.727936  | 2.085352  |
| 196 | 1  | 0 | 0.065570  | 6.418079  | -0.039262 |
| 197 | 1  | 0 | -2.999905 | 2.170134  | 0.321056  |
| 198 | 1  | 0 | -1.470771 | 3.107094  | 2.323099  |

---

**Cartesian coordinates of Designed Molecule M3**

---

| Center<br>Number | Atomic<br>Number | Atomic<br>Type | Coordinates (Angstroms) |           |           |
|------------------|------------------|----------------|-------------------------|-----------|-----------|
|                  |                  |                | X                       | Y         | Z         |
| 1                | 6                | 0              | 5.671294                | -1.291266 | 0.361499  |
| 2                | 6                | 0              | 7.045391                | -1.016309 | 0.285454  |
| 3                | 6                | 0              | 7.309641                | 0.317161  | 0.008921  |
| 4                | 16               | 0              | 5.878462                | 1.251182  | -0.157446 |
| 5                | 1                | 0              | 5.238359                | -2.256456 | 0.591110  |
| 6                | 6                | 0              | 8.660019                | -2.015074 | 3.057545  |



|    |    |   |            |           |           |
|----|----|---|------------|-----------|-----------|
| 7  | 6  | 0 | 10.109774  | -1.525780 | 3.279071  |
| 8  | 6  | 0 | 7.615667   | -0.942161 | 3.394640  |
| 9  | 6  | 0 | 7.624100   | -0.466439 | 4.843545  |
| 10 | 6  | 0 | 10.715790  | -1.839274 | 4.659928  |
| 11 | 6  | 0 | 11.521804  | -3.139028 | 4.730107  |
| 12 | 6  | 0 | 10.725249  | -4.415804 | 4.484714  |
| 13 | 6  | 0 | 9.617584   | -3.593352 | -1.135748 |
| 14 | 6  | 0 | 9.269280   | -5.092060 | -1.227910 |
| 15 | 6  | 0 | 10.317245  | -3.001689 | -2.376372 |
| 16 | 6  | 0 | 11.823053  | -3.226976 | -2.489521 |
| 17 | 6  | 0 | 10.423079  | -6.090543 | -1.416661 |
| 18 | 6  | 0 | 10.639347  | -6.571931 | -2.855667 |
| 19 | 6  | 0 | 9.557953   | -7.530962 | -3.343844 |
| 20 | 6  | 0 | 8.718717   | 0.509039  | -0.056028 |
| 21 | 6  | 0 | 9.350623   | -0.720563 | 0.175192  |
| 22 | 6  | 0 | 10.729818  | -0.592319 | 0.099582  |
| 23 | 6  | 0 | 11.165922  | 0.716401  | -0.175832 |
| 24 | 16 | 0 | 9.790984   | 1.809365  | -0.346704 |
| 25 | 6  | 0 | -5.760314  | 1.067754  | -0.341321 |
| 26 | 6  | 0 | -7.136714  | 0.805577  | -0.263251 |
| 27 | 6  | 0 | -7.412504  | -0.528032 | 0.007178  |
| 28 | 16 | 0 | -5.988415  | -1.466011 | 0.210057  |
| 29 | 1  | 0 | -5.318592  | 2.025926  | -0.582638 |
| 30 | 6  | 0 | -9.686858  | 2.595829  | -2.619581 |
| 31 | 6  | 0 | -9.323946  | 3.844862  | -3.442525 |
| 32 | 6  | 0 | -10.410869 | 1.502215  | -3.431881 |
| 33 | 6  | 0 | -11.926438 | 1.640787  | -3.550440 |
| 34 | 6  | 0 | -10.456448 | 4.573523  | -4.159648 |
| 35 | 6  | 0 | -10.003616 | 5.896559  | -4.774322 |
| 36 | 6  | 0 | -11.116144 | 6.618491  | -5.525034 |

|    |    |   |            |           |           |
|----|----|---|------------|-----------|-----------|
| 37 | 6  | 0 | -9.418498  | 3.962071  | 2.501037  |
| 38 | 6  | 0 | -7.688494  | 2.054939  | 2.702305  |
| 39 | 6  | 0 | -6.408728  | 2.873629  | 2.846926  |
| 40 | 6  | 0 | -8.727067  | 5.282928  | 2.149749  |
| 41 | 6  | 0 | -9.282517  | 6.484203  | 2.919980  |
| 42 | 6  | 0 | -10.740188 | 6.814155  | 2.614149  |
| 43 | 6  | 0 | -8.824140  | -0.716178 | 0.038828  |
| 44 | 6  | 0 | -9.442826  | 0.510349  | -0.235480 |
| 45 | 6  | 0 | -10.823344 | 0.404476  | -0.162655 |
| 46 | 6  | 0 | -11.276162 | -0.892860 | 0.141820  |
| 47 | 16 | 0 | -9.914060  | -1.995234 | 0.354659  |
| 48 | 6  | 0 | 12.546212  | 0.987231  | -0.291779 |
| 49 | 6  | 0 | 13.282243  | 2.121683  | -0.548953 |
| 50 | 6  | 0 | 12.729124  | 3.471886  | -0.753281 |
| 51 | 6  | 0 | 14.734003  | 2.212926  | -0.647146 |
| 52 | 6  | 0 | 13.879362  | 4.375737  | -0.954518 |
| 53 | 6  | 0 | 15.069000  | 3.636553  | -0.888957 |
| 54 | 6  | 0 | 16.273162  | 5.673269  | -1.270344 |
| 55 | 6  | 0 | 15.079651  | 6.394135  | -1.334230 |
| 56 | 6  | 0 | 13.860121  | 5.741781  | -1.174802 |
| 57 | 1  | 0 | 17.216929  | 6.192727  | -1.395008 |
| 58 | 1  | 0 | 15.106715  | 7.464175  | -1.508170 |
| 59 | 1  | 0 | 12.913482  | 6.268464  | -1.217856 |
| 60 | 6  | 0 | 15.662613  | 1.195959  | -0.555076 |
| 61 | 6  | 0 | 17.067666  | 1.403334  | -0.667748 |
| 62 | 6  | 0 | 15.325575  | -0.172736 | -0.346888 |
| 63 | 7  | 0 | 18.220672  | 1.526217  | -0.752604 |
| 64 | 7  | 0 | 15.081056  | -1.297620 | -0.179488 |
| 65 | 8  | 0 | 11.552692  | 3.799356  | -0.754429 |
| 66 | 6  | 0 | -12.660837 | -1.153624 | 0.227739  |

|    |   |   |            |           |           |
|----|---|---|------------|-----------|-----------|
| 67 | 6 | 0 | -13.409506 | -2.276623 | 0.498036  |
| 68 | 6 | 0 | -12.867727 | -3.607737 | 0.822968  |
| 69 | 6 | 0 | -14.864478 | -2.363254 | 0.540389  |
| 70 | 6 | 0 | -14.025964 | -4.485647 | 1.083251  |
| 71 | 6 | 0 | -15.210643 | -3.753162 | 0.922029  |
| 72 | 6 | 0 | -16.435254 | -4.390264 | 1.124869  |
| 73 | 6 | 0 | -16.431215 | -5.738354 | 1.481338  |
| 74 | 6 | 0 | -15.242560 | -6.453518 | 1.636211  |
| 75 | 6 | 0 | -14.017235 | -5.823844 | 1.435473  |
| 76 | 1 | 0 | -17.377685 | -3.872654 | 1.015411  |
| 77 | 1 | 0 | -17.379499 | -6.239595 | 1.641300  |
| 78 | 1 | 0 | -15.277901 | -7.501272 | 1.913601  |
| 79 | 1 | 0 | -13.074072 | -6.346757 | 1.546678  |
| 80 | 6 | 0 | -15.787502 | -1.373708 | 0.269298  |
| 81 | 6 | 0 | -17.196298 | -1.572057 | 0.345951  |
| 82 | 6 | 0 | -15.440869 | -0.049222 | -0.125491 |
| 83 | 7 | 0 | -18.351946 | -1.688556 | 0.396991  |
| 84 | 7 | 0 | -15.188475 | 1.038452  | -0.451686 |
| 85 | 8 | 0 | -11.693200 | -3.937497 | 0.876639  |
| 86 | 1 | 0 | -11.525761 | 1.214900  | -0.315429 |
| 87 | 1 | 0 | 11.445541  | -1.393501 | 0.234871  |
| 88 | 6 | 0 | 8.326374   | -1.829837 | 0.373845  |
| 89 | 6 | 0 | 8.430566   | -2.665646 | 1.677405  |
| 90 | 6 | 0 | -8.413005  | 1.595724  | -0.505219 |
| 91 | 6 | 0 | -8.384260  | 2.036871  | -2.000515 |
| 92 | 6 | 0 | -8.567639  | 2.850213  | 0.389577  |
| 93 | 6 | 0 | -8.845888  | 2.663204  | 1.889176  |
| 94 | 6 | 0 | 8.314308   | -2.809492 | -0.840660 |
| 95 | 1 | 0 | 13.118728  | 0.079246  | -0.140766 |
| 96 | 1 | 0 | 8.023747   | -2.239621 | -1.729335 |

|     |   |   |           |           |           |
|-----|---|---|-----------|-----------|-----------|
| 97  | 1 | 0 | 7.492745  | -3.511373 | -0.655627 |
| 98  | 1 | 0 | 10.304215 | -3.475957 | -0.285165 |
| 99  | 1 | 0 | 9.810970  | -3.373119 | -3.276997 |
| 100 | 1 | 0 | 10.148572 | -1.919333 | -2.371405 |
| 101 | 1 | 0 | 12.093698 | -4.276059 | -2.613482 |
| 102 | 1 | 0 | 12.223256 | -2.685788 | -3.351064 |
| 103 | 1 | 0 | 12.350654 | -2.857358 | -1.604947 |
| 104 | 1 | 0 | 8.733711  | -5.345232 | -0.305420 |
| 105 | 1 | 0 | 8.532424  | -5.221550 | -2.032196 |
| 106 | 1 | 0 | 11.348841 | -5.656526 | -1.024814 |
| 107 | 1 | 0 | 10.232124 | -6.974221 | -0.796188 |
| 108 | 1 | 0 | 10.695293 | -5.713716 | -3.534348 |
| 109 | 1 | 0 | 11.611684 | -7.073100 | -2.920723 |
| 110 | 1 | 0 | 9.520347  | -8.429405 | -2.720133 |
| 111 | 1 | 0 | 8.564618  | -7.073193 | -3.319458 |
| 112 | 1 | 0 | 9.745037  | -7.848282 | -4.372991 |
| 113 | 1 | 0 | 7.500374  | -3.246179 | 1.725228  |
| 114 | 1 | 0 | 9.226725  | -3.403673 | 1.529804  |
| 115 | 1 | 0 | 8.494682  | -2.842119 | 3.761918  |
| 116 | 1 | 0 | 10.766215 | -1.968493 | 2.521096  |
| 117 | 1 | 0 | 10.150469 | -0.446236 | 3.099217  |
| 118 | 1 | 0 | 11.382167 | -1.019133 | 4.948850  |
| 119 | 1 | 0 | 9.927191  | -1.864841 | 5.420138  |
| 120 | 1 | 0 | 12.346513 | -3.082916 | 4.008656  |
| 121 | 1 | 0 | 11.992540 | -3.200924 | 5.717981  |
| 122 | 1 | 0 | 10.307157 | -4.449469 | 3.474555  |
| 123 | 1 | 0 | 11.357306 | -5.300121 | 4.602035  |
| 124 | 1 | 0 | 9.893814  | -4.507797 | 5.190846  |
| 125 | 1 | 0 | -7.675276 | 3.469139  | 0.240383  |
| 126 | 1 | 0 | -9.398187 | 3.431701  | -0.026970 |

|     |   |   |            |          |           |
|-----|---|---|------------|----------|-----------|
| 127 | 1 | 0 | -9.655656  | 1.926757 | 1.965586  |
| 128 | 1 | 0 | -9.432940  | 3.847942 | 3.592928  |
| 129 | 1 | 0 | -10.469416 | 4.037268 | 2.197843  |
| 130 | 1 | 0 | -7.652915  | 5.212420 | 2.343129  |
| 131 | 1 | 0 | -8.828184  | 5.480151 | 1.075117  |
| 132 | 1 | 0 | -9.166398  | 6.305605 | 3.996272  |
| 133 | 1 | 0 | -8.664669  | 7.360176 | 2.692015  |
| 134 | 1 | 0 | -10.888563 | 6.987903 | 1.543495  |
| 135 | 1 | 0 | -11.415437 | 6.009012 | 2.914699  |
| 136 | 1 | 0 | -11.057080 | 7.717436 | 3.141791  |
| 137 | 1 | 0 | -7.437549  | 1.082336 | 2.269047  |
| 138 | 1 | 0 | -8.075139  | 1.836752 | 3.704932  |
| 139 | 1 | 0 | -6.559603  | 3.765443 | 3.459378  |
| 140 | 1 | 0 | -5.631828  | 2.276631 | 3.331992  |
| 141 | 1 | 0 | -6.009846  | 3.196097 | 1.880738  |
| 142 | 1 | 0 | -8.043382  | 1.187005 | -2.601240 |
| 143 | 1 | 0 | -7.589869  | 2.789426 | -2.070905 |
| 144 | 1 | 0 | -10.361889 | 2.919448 | -1.814574 |
| 145 | 1 | 0 | -8.829624  | 4.556209 | -2.767107 |
| 146 | 1 | 0 | -8.562187  | 3.560132 | -4.182085 |
| 147 | 1 | 0 | -10.867632 | 3.939722 | -4.953059 |
| 148 | 1 | 0 | -11.279975 | 4.764387 | -3.459464 |
| 149 | 1 | 0 | -9.612439  | 6.547009 | -3.982105 |
| 150 | 1 | 0 | -9.162745  | 5.709958 | -5.453888 |
| 151 | 1 | 0 | -11.958994 | 6.841183 | -4.863873 |
| 152 | 1 | 0 | -10.766930 | 7.564147 | -5.947544 |
| 153 | 1 | 0 | -11.497604 | 6.007909 | -6.348903 |
| 154 | 1 | 0 | -9.959543  | 1.455332 | -4.431940 |
| 155 | 1 | 0 | -10.200616 | 0.532128 | -2.969248 |
| 156 | 1 | 0 | -12.343899 | 0.801159 | -4.112502 |

|     |    |   |            |           |           |
|-----|----|---|------------|-----------|-----------|
| 157 | 1  | 0 | -12.406330 | 1.640001  | -2.567329 |
| 158 | 1  | 0 | -12.231915 | 2.557168  | -4.056755 |
| 159 | 1  | 0 | -13.224080 | -0.247779 | 0.034494  |
| 160 | 1  | 0 | 7.762552   | -0.078242 | 2.737092  |
| 161 | 1  | 0 | 6.619122   | -1.334193 | 3.159884  |
| 162 | 1  | 0 | 7.478240   | -1.298685 | 5.539551  |
| 163 | 1  | 0 | 8.562577   | 0.027540  | 5.107673  |
| 164 | 1  | 0 | 6.818853   | 0.252438  | 5.016102  |
| 165 | 6  | 0 | 16.287761  | 4.296450  | -1.049531 |
| 166 | 1  | 0 | 17.233654  | 3.775312  | -1.006608 |
| 167 | 6  | 0 | 4.893834   | -0.163717 | 0.148443  |
| 168 | 6  | 0 | -4.992001  | -0.060683 | -0.100549 |
| 169 | 6  | 0 | 1.207900   | -0.734585 | 0.014140  |
| 170 | 6  | 0 | 1.063197   | 0.663688  | 0.234865  |
| 171 | 6  | 0 | -0.168536  | 1.311383  | 0.261656  |
| 172 | 6  | 0 | -1.306419  | 0.501278  | 0.064937  |
| 173 | 6  | 0 | -1.162501  | -0.897005 | -0.158070 |
| 174 | 6  | 0 | 0.069542   | -1.544105 | -0.182642 |
| 175 | 6  | 0 | 2.579923   | -1.123291 | -0.042409 |
| 176 | 6  | 0 | 3.453782   | -0.087941 | 0.145186  |
| 177 | 1  | 0 | 2.901419   | -2.132861 | -0.259534 |
| 178 | 6  | 0 | -2.678124  | 0.891707  | 0.117689  |
| 179 | 6  | 0 | -3.552588  | -0.141308 | -0.078095 |
| 180 | 16 | 0 | -2.722956  | -1.667333 | -0.331998 |
| 181 | 16 | 0 | 2.622947   | 1.436705  | 0.400834  |
| 182 | 1  | 0 | -2.998873  | 1.900728  | 0.338468  |
| 183 | 6  | 0 | 0.187490   | -3.005302 | -0.392196 |
| 184 | 6  | 0 | 0.831841   | -3.814818 | 0.550609  |
| 185 | 6  | 0 | -0.349109  | -3.604914 | -1.535922 |
| 186 | 6  | 0 | 0.948396   | -5.183598 | 0.346257  |

|     |    |   |           |           |           |
|-----|----|---|-----------|-----------|-----------|
| 187 | 1  | 0 | 1.236363  | -3.366996 | 1.451275  |
| 188 | 6  | 0 | -0.241032 | -4.973865 | -1.707606 |
| 189 | 1  | 0 | -0.849156 | -3.020294 | -2.299046 |
| 190 | 6  | 0 | 0.415563  | -5.797387 | -0.791226 |
| 191 | 1  | 0 | 1.456444  | -5.802602 | 1.077181  |
| 192 | 6  | 0 | -0.284258 | 2.771964  | 0.471888  |
| 193 | 6  | 0 | 0.252773  | 3.373539  | 1.616825  |
| 194 | 6  | 0 | -0.922888 | 3.586113  | -0.467595 |
| 195 | 6  | 0 | 0.138933  | 4.737774  | 1.787577  |
| 196 | 1  | 0 | 0.743192  | 2.790552  | 2.387273  |
| 197 | 6  | 0 | -1.025565 | 4.960379  | -0.278500 |
| 198 | 1  | 0 | -1.327757 | 3.141477  | -1.369924 |
| 199 | 6  | 0 | -0.493990 | 5.570507  | 0.860045  |
| 200 | 1  | 0 | -1.518102 | 5.558622  | -1.034786 |
| 201 | 16 | 0 | -0.544963 | 7.290095  | 1.239536  |
| 202 | 16 | 0 | 0.495570  | -7.556787 | -0.968570 |
| 203 | 6  | 0 | -1.392084 | 7.974172  | -0.199797 |
| 204 | 6  | 0 | 1.284417  | -7.741037 | -2.594682 |
| 205 | 1  | 0 | -0.831689 | 7.799847  | -1.119918 |
| 206 | 1  | 0 | -2.408605 | 7.588449  | -0.294970 |
| 207 | 1  | 0 | -1.443492 | 9.048872  | -0.022111 |
| 208 | 1  | 0 | 2.270657  | -7.276235 | -2.603270 |
| 209 | 1  | 0 | 1.395739  | -8.814538 | -2.753074 |
| 210 | 1  | 0 | 0.660091  | -7.324199 | -3.382724 |
| 211 | 9  | 0 | 0.647298  | 5.298928  | 2.893497  |
| 212 | 9  | 0 | -0.782601 | -5.515479 | -2.806635 |

---

**Cartesian coordinates of Designed Molecule M4**

---

| Center | Atomic | Atomic | Coordinates (Angstroms) |
|--------|--------|--------|-------------------------|
|--------|--------|--------|-------------------------|

| Number | Number | Type | X         | Y         | Z         |
|--------|--------|------|-----------|-----------|-----------|
| 1      | 6      | 0    | -0.973252 | 0.933188  | 0.201076  |
| 2      | 6      | 0    | 0.398490  | 1.138391  | 0.206241  |
| 3      | 6      | 0    | 1.276086  | 0.033577  | 0.151838  |
| 4      | 6      | 0    | 0.696475  | -1.241062 | 0.068972  |
| 5      | 6      | 0    | -0.675885 | -1.445539 | 0.026079  |
| 6      | 6      | 0    | -1.555201 | -0.339424 | 0.098148  |
| 7      | 1      | 0    | -1.621300 | 1.795446  | 0.316052  |
| 8      | 1      | 0    | 1.355347  | -2.100112 | 0.052253  |
| 9      | 6      | 0    | 2.720218  | 0.195011  | 0.159060  |
| 10     | 6      | 0    | 3.480957  | 1.252791  | 0.626705  |
| 11     | 6      | 0    | 4.859956  | 1.039247  | 0.468873  |
| 12     | 6      | 0    | 5.152803  | -0.186561 | -0.107975 |
| 13     | 16     | 0    | 3.740194  | -1.078007 | -0.502119 |
| 14     | 1      | 0    | 3.027228  | 2.128183  | 1.068328  |
| 15     | 6      | 0    | 6.286033  | 3.540963  | -1.233258 |
| 16     | 6      | 0    | 7.714785  | 3.316805  | -1.780835 |
| 17     | 6      | 0    | 5.207256  | 2.846507  | -2.078039 |
| 18     | 6      | 0    | 5.111664  | 3.319786  | -3.524709 |
| 19     | 6      | 0    | 8.243260  | 4.405867  | -2.732713 |
| 20     | 6      | 0    | 9.039673  | 5.523306  | -2.053805 |
| 21     | 6      | 0    | 8.256790  | 6.378141  | -1.063434 |
| 22     | 6      | 0    | 7.481539  | 2.403709  | 3.027192  |
| 23     | 6      | 0    | 7.130476  | 3.590214  | 3.947016  |
| 24     | 6      | 0    | 8.245829  | 1.246706  | 3.701262  |
| 25     | 6      | 0    | 9.751469  | 1.426753  | 3.874219  |
| 26     | 6      | 0    | 8.290706  | 4.364822  | 4.595431  |
| 27     | 6      | 0    | 8.566922  | 4.010780  | 6.060796  |
| 28     | 6      | 0    | 7.507905  | 4.540809  | 7.022363  |



|    |    |   |           |           |           |
|----|----|---|-----------|-----------|-----------|
| 29 | 6  | 0 | 6.564966  | -0.326066 | -0.212681 |
| 30 | 6  | 0 | 7.171781  | 0.826372  | 0.307128  |
| 31 | 6  | 0 | 8.553687  | 0.728673  | 0.251425  |
| 32 | 6  | 0 | 9.018825  | -0.474526 | -0.312466 |
| 33 | 16 | 0 | 7.664711  | -1.506798 | -0.779077 |
| 34 | 6  | 0 | -3.004233 | -0.482619 | 0.059697  |
| 35 | 6  | 0 | -3.795702 | -1.574640 | 0.376104  |
| 36 | 6  | 0 | -5.168211 | -1.315991 | 0.215704  |
| 37 | 6  | 0 | -5.426465 | -0.022417 | -0.207660 |
| 38 | 16 | 0 | -3.988952 | 0.880420  | -0.458427 |
| 39 | 1  | 0 | -3.369542 | -2.510181 | 0.705012  |
| 40 | 6  | 0 | -7.766560 | -2.850845 | 2.690757  |
| 41 | 6  | 0 | -7.404965 | -4.085543 | 3.534425  |
| 42 | 6  | 0 | -8.486390 | -1.735773 | 3.477749  |
| 43 | 6  | 0 | -9.998007 | -1.883869 | 3.632920  |
| 44 | 6  | 0 | -8.538858 | -4.813918 | 4.249930  |
| 45 | 6  | 0 | -8.086703 | -6.137006 | 4.865064  |
| 46 | 6  | 0 | -9.199820 | -6.859267 | 5.614466  |
| 47 | 6  | 0 | -5.563507 | -3.694002 | -2.635456 |
| 48 | 6  | 0 | -8.117438 | -3.287206 | -2.313360 |
| 49 | 6  | 0 | -8.151964 | -1.995938 | -3.125874 |
| 50 | 6  | 0 | -4.892567 | -2.359670 | -2.962842 |
| 51 | 6  | 0 | -3.858719 | -2.475856 | -4.086583 |
| 52 | 6  | 0 | -2.662977 | -3.361236 | -3.747587 |
| 53 | 6  | 0 | -6.834030 | 0.177013  | -0.269519 |
| 54 | 6  | 0 | -7.472764 | -1.009529 | 0.117406  |
| 55 | 6  | 0 | -8.851338 | -0.863137 | 0.099066  |
| 56 | 6  | 0 | -9.282247 | 0.414439  | -0.306184 |
| 57 | 16 | 0 | -7.901047 | 1.451870  | -0.669841 |
| 58 | 6  | 0 | 10.404712 | -0.711004 | -0.420988 |

|    |   |   |            |           |           |
|----|---|---|------------|-----------|-----------|
| 59 | 6 | 0 | 11.167919  | -1.751646 | -0.903224 |
| 60 | 6 | 0 | 10.647210  | -2.985401 | -1.515276 |
| 61 | 6 | 0 | 12.622395  | -1.822566 | -0.917825 |
| 62 | 6 | 0 | 11.820282  | -3.790067 | -1.911800 |
| 63 | 6 | 0 | 12.993818  | -3.105140 | -1.565085 |
| 64 | 6 | 0 | 14.228302  | -3.688057 | -1.854046 |
| 65 | 6 | 0 | 14.244814  | -4.934895 | -2.478704 |
| 66 | 6 | 0 | 13.067008  | -5.603394 | -2.815410 |
| 67 | 6 | 0 | 11.831921  | -5.027701 | -2.530474 |
| 68 | 1 | 0 | 15.163572  | -3.205167 | -1.610263 |
| 69 | 1 | 0 | 15.201205  | -5.392718 | -2.706331 |
| 70 | 1 | 0 | 13.118310  | -6.572149 | -3.300106 |
| 71 | 1 | 0 | 10.896232  | -5.516497 | -2.777394 |
| 72 | 6 | 0 | 13.520440  | -0.899926 | -0.419973 |
| 73 | 6 | 0 | 14.934934  | -1.057877 | -0.483016 |
| 74 | 6 | 0 | 13.135031  | 0.312682  | 0.221557  |
| 75 | 7 | 0 | 16.094735  | -1.135520 | -0.509110 |
| 76 | 7 | 0 | 12.842731  | 1.307063  | 0.749848  |
| 77 | 8 | 0 | 9.477734   | -3.300413 | -1.673758 |
| 78 | 6 | 0 | -10.659794 | 0.709528  | -0.366111 |
| 79 | 6 | 0 | -11.384537 | 1.827210  | -0.717010 |
| 80 | 6 | 0 | -10.813900 | 3.099698  | -1.190394 |
| 81 | 6 | 0 | -12.836025 | 1.959716  | -0.717017 |
| 82 | 6 | 0 | -11.953251 | 3.985425  | -1.503755 |
| 83 | 6 | 0 | -13.153285 | 3.314804  | -1.228831 |
| 84 | 6 | 0 | -14.364087 | 3.969169  | -1.457675 |
| 85 | 6 | 0 | -14.331298 | 5.271609  | -1.954988 |
| 86 | 6 | 0 | -13.127492 | 5.925306  | -2.222413 |
| 87 | 6 | 0 | -11.915802 | 5.278224  | -1.995379 |
| 88 | 1 | 0 | -15.317436 | 3.498315  | -1.263951 |

|     |   |   |            |           |           |
|-----|---|---|------------|-----------|-----------|
| 89  | 1 | 0 | -15.268819 | 5.785478  | -2.136902 |
| 90  | 1 | 0 | -13.140329 | 6.938799  | -2.608032 |
| 91  | 1 | 0 | -10.961472 | 5.753846  | -2.191436 |
| 92  | 6 | 0 | -13.780690 | 1.037581  | -0.312742 |
| 93  | 6 | 0 | -15.183746 | 1.279856  | -0.360333 |
| 94  | 6 | 0 | -13.464661 | -0.251172 | 0.206083  |
| 95  | 7 | 0 | -16.335942 | 1.434084  | -0.382848 |
| 96  | 7 | 0 | -13.239735 | -1.308819 | 0.635088  |
| 97  | 8 | 0 | -9.632478  | 3.383806  | -1.314459 |
| 98  | 1 | 0 | -9.570512  | -1.629297 | 0.360487  |
| 99  | 1 | 0 | 9.253384   | 1.480716  | 0.594420  |
| 100 | 6 | 0 | 6.125108   | 1.798270  | 0.835203  |
| 101 | 6 | 0 | 6.151751   | 3.244835  | 0.274765  |
| 102 | 6 | 0 | -6.452219  | -2.070871 | 0.501415  |
| 103 | 6 | 0 | -6.465336  | -2.310806 | 2.046771  |
| 104 | 6 | 0 | -6.565004  | -3.458434 | -0.188384 |
| 105 | 6 | 0 | -6.783158  | -3.772003 | -1.694298 |
| 106 | 6 | 0 | 6.173019   | 1.870540  | 2.391743  |
| 107 | 1 | 0 | 10.959773  | 0.132550  | -0.025543 |
| 108 | 1 | 0 | 5.957346   | 0.870424  | 2.781544  |
| 109 | 1 | 0 | 5.326790   | 2.497202  | 2.696218  |
| 110 | 1 | 0 | 8.127266   | 2.797628  | 2.229327  |
| 111 | 1 | 0 | 7.776152   | 1.029728  | 4.669732  |
| 112 | 1 | 0 | 8.092654   | 0.347850  | 3.093518  |
| 113 | 1 | 0 | 10.011152  | 2.231039  | 4.562881  |
| 114 | 1 | 0 | 10.200407  | 0.509151  | 4.263863  |
| 115 | 1 | 0 | 10.240183  | 1.643468  | 2.919143  |
| 116 | 1 | 0 | 6.535342   | 4.286475  | 3.345103  |
| 117 | 1 | 0 | 6.446565   | 3.227772  | 4.726473  |
| 118 | 1 | 0 | 9.199734   | 4.228331  | 4.000348  |

|     |   |   |           |           |           |
|-----|---|---|-----------|-----------|-----------|
| 119 | 1 | 0 | 8.072186  | 5.438303  | 4.548576  |
| 120 | 1 | 0 | 8.647234  | 2.923918  | 6.174625  |
| 121 | 1 | 0 | 9.542402  | 4.418705  | 6.348765  |
| 122 | 1 | 0 | 7.452607  | 5.633013  | 6.981005  |
| 123 | 1 | 0 | 6.512430  | 4.153171  | 6.786512  |
| 124 | 1 | 0 | 7.731760  | 4.258116  | 8.054278  |
| 125 | 1 | 0 | 5.224469  | 3.710298  | 0.631977  |
| 126 | 1 | 0 | 6.962548  | 3.778865  | 0.782838  |
| 127 | 1 | 0 | 6.087985  | 4.619635  | -1.301916 |
| 128 | 1 | 0 | 8.418603  | 3.239454  | -0.944183 |
| 129 | 1 | 0 | 7.754410  | 2.342674  | -2.280428 |
| 130 | 1 | 0 | 8.896303  | 3.939297  | -3.478532 |
| 131 | 1 | 0 | 7.413634  | 4.846564  | -3.296162 |
| 132 | 1 | 0 | 9.903780  | 5.080417  | -1.543004 |
| 133 | 1 | 0 | 9.454124  | 6.174091  | -2.832382 |
| 134 | 1 | 0 | 7.898432  | 5.792731  | -0.211930 |
| 135 | 1 | 0 | 8.880910  | 7.181582  | -0.662913 |
| 136 | 1 | 0 | 7.386019  | 6.841879  | -1.537783 |
| 137 | 1 | 0 | -5.662268 | -4.005362 | 0.113940  |
| 138 | 1 | 0 | -7.388422 | -3.967175 | 0.325182  |
| 139 | 1 | 0 | -6.934678 | -4.858135 | -1.620002 |
| 140 | 1 | 0 | -5.878674 | -4.156366 | -3.582026 |
| 141 | 1 | 0 | -4.801064 | -4.369157 | -2.227500 |
| 142 | 1 | 0 | -5.636301 | -1.613042 | -3.248012 |
| 143 | 1 | 0 | -4.392177 | -1.970046 | -2.073738 |
| 144 | 1 | 0 | -4.346625 | -2.851047 | -4.995434 |
| 145 | 1 | 0 | -3.497514 | -1.470525 | -4.330341 |
| 146 | 1 | 0 | -2.183671 | -3.026015 | -2.822316 |
| 147 | 1 | 0 | -2.954428 | -4.406489 | -3.611475 |
| 148 | 1 | 0 | -1.913432 | -3.334381 | -4.543125 |

|     |   |   |            |           |           |
|-----|---|---|------------|-----------|-----------|
| 149 | 1 | 0 | -8.865901  | -3.231918 | -1.515275 |
| 150 | 1 | 0 | -8.468881  | -4.086990 | -2.976237 |
| 151 | 1 | 0 | -7.575494  | -2.090553 | -4.049897 |
| 152 | 1 | 0 | -9.182711  | -1.769271 | -3.412466 |
| 153 | 1 | 0 | -7.768346  | -1.135147 | -2.576798 |
| 154 | 1 | 0 | -6.186924  | -1.369637 | 2.531649  |
| 155 | 1 | 0 | -5.640437  | -3.004011 | 2.248635  |
| 156 | 1 | 0 | -8.449714  | -3.187964 | 1.898434  |
| 157 | 1 | 0 | -6.900130  | -4.801274 | 2.871429  |
| 158 | 1 | 0 | -6.650516  | -3.787727 | 4.276114  |
| 159 | 1 | 0 | -8.951243  | -4.180546 | 5.042969  |
| 160 | 1 | 0 | -9.361695  | -5.004357 | 3.548782  |
| 161 | 1 | 0 | -7.694702  | -6.787386 | 4.073217  |
| 162 | 1 | 0 | -7.246410  | -5.950547 | 5.545356  |
| 163 | 1 | 0 | -10.041989 | -7.081876 | 4.952383  |
| 164 | 1 | 0 | -8.850807  | -7.804997 | 6.036986  |
| 165 | 1 | 0 | -9.582353  | -6.249075 | 6.438174  |
| 166 | 1 | 0 | -8.015574  | -1.643086 | 4.465538  |
| 167 | 1 | 0 | -8.297950  | -0.783041 | 2.970964  |
| 168 | 1 | 0 | -10.412631 | -1.021510 | 4.161721  |
| 169 | 1 | 0 | -10.496944 | -1.934698 | 2.660650  |
| 170 | 1 | 0 | -10.285240 | -2.776658 | 4.189397  |
| 171 | 1 | 0 | -11.241752 | -0.154178 | -0.065309 |
| 172 | 1 | 0 | 5.385114   | 1.765705  | -2.070600 |
| 173 | 1 | 0 | 4.233743   | 2.992857  | -1.595448 |
| 174 | 1 | 0 | 4.930930   | 4.398037  | -3.583259 |
| 175 | 1 | 0 | 6.023436   | 3.104728  | -4.087293 |
| 176 | 1 | 0 | 4.287352   | 2.818862  | -4.039371 |
| 177 | 8 | 0 | 0.929618   | 2.372793  | 0.303893  |
| 178 | 8 | 0 | -1.231450  | -2.678059 | -0.082906 |

|     |   |   |           |           |           |
|-----|---|---|-----------|-----------|-----------|
| 179 | 6 | 0 | 0.158356  | 3.458968  | -0.159866 |
| 180 | 6 | 0 | -0.373877 | -3.784671 | -0.270143 |
| 181 | 1 | 0 | 0.864094  | 4.249546  | -0.416185 |
| 182 | 1 | 0 | -0.402462 | 3.181609  | -1.060894 |
| 183 | 1 | 0 | -0.535348 | 3.820843  | 0.606170  |
| 184 | 1 | 0 | -1.021957 | -4.648290 | -0.413538 |
| 185 | 1 | 0 | 0.254242  | -3.656781 | -1.158354 |
| 186 | 1 | 0 | 0.263330  | -3.954476 | 0.604517  |

-----

**Cartesian coordinates of Designed Molecule M5**

-----

| Center<br>Number | Atomic<br>Number | Atomic<br>Type | Coordinates (Angstroms) |   |   |
|------------------|------------------|----------------|-------------------------|---|---|
|                  |                  |                | X                       | Y | Z |

-----

|    |    |   |           |           |           |
|----|----|---|-----------|-----------|-----------|
| 1  | 6  | 0 | 6.594239  | 0.475630  | 0.017251  |
| 2  | 6  | 0 | 7.221081  | -0.753511 | -0.117304 |
| 3  | 6  | 0 | 8.620455  | -0.648250 | -0.103117 |
| 4  | 6  | 0 | 9.056597  | 0.662122  | 0.022863  |
| 5  | 16 | 0 | 7.758031  | 1.779238  | 0.158106  |
| 6  | 1  | 0 | 6.668539  | -1.678956 | -0.225919 |
| 7  | 6  | 0 | 10.015461 | -2.604062 | 2.236430  |
| 8  | 6  | 0 | 11.507968 | -2.391934 | 2.576298  |
| 9  | 6  | 0 | 9.102962  | -1.548539 | 2.875213  |
| 10 | 6  | 0 | 9.126896  | -1.508643 | 4.399432  |
| 11 | 6  | 0 | 12.026572 | -3.150942 | 3.812583  |
| 12 | 6  | 0 | 12.672904 | -4.505324 | 3.509214  |
| 13 | 6  | 0 | 11.740674 | -5.550903 | 2.907311  |
| 14 | 6  | 0 | 10.880139 | -3.016998 | -2.242271 |
| 15 | 6  | 0 | 10.321746 | -4.354947 | -2.772330 |
| 16 | 6  | 0 | 11.709512 | -2.185634 | -3.242195 |

|    |    |   |            |           |           |
|----|----|---|------------|-----------|-----------|
| 17 | 6  | 0 | 13.178423  | -2.570540 | -3.403268 |
| 18 | 6  | 0 | 11.313083  | -5.429213 | -3.248826 |
| 19 | 6  | 0 | 11.524075  | -5.499596 | -4.766308 |
| 20 | 6  | 0 | 10.330541  | -6.082081 | -5.517195 |
| 21 | 6  | 0 | 10.478873  | 0.685045  | 0.002384  |
| 22 | 6  | 0 | 10.946318  | -0.627860 | -0.145549 |
| 23 | 6  | 0 | 12.332517  | -0.659314 | -0.191218 |
| 24 | 6  | 0 | 12.935129  | 0.606142  | -0.070502 |
| 25 | 16 | 0 | 11.711588  | 1.866502  | 0.100716  |
| 26 | 6  | 0 | -6.773361  | -0.378302 | 0.118923  |
| 27 | 6  | 0 | -7.407495  | 0.848575  | -0.001117 |
| 28 | 6  | 0 | -8.806664  | 0.737455  | 0.052459  |
| 29 | 6  | 0 | -9.235347  | -0.575625 | 0.169558  |
| 30 | 16 | 0 | -7.929872  | -1.686247 | 0.280441  |
| 31 | 1  | 0 | -6.861451  | 1.777118  | -0.115222 |
| 32 | 6  | 0 | -11.044065 | 3.001718  | -2.164108 |
| 33 | 6  | 0 | -10.510814 | 4.334627  | -2.727375 |
| 34 | 6  | 0 | -11.806726 | 2.119859  | -3.175254 |
| 35 | 6  | 0 | -13.287077 | 2.432241  | -3.385417 |
| 36 | 6  | 0 | -11.502769 | 5.324403  | -3.331456 |
| 37 | 6  | 0 | -10.859347 | 6.673408  | -3.647388 |
| 38 | 6  | 0 | -11.830828 | 7.667231  | -4.272745 |
| 39 | 6  | 0 | -9.355572  | 2.950813  | 3.459598  |
| 40 | 6  | 0 | -11.821595 | 2.974499  | 2.749880  |
| 41 | 6  | 0 | -12.181299 | 1.728325  | 3.555073  |
| 42 | 6  | 0 | -8.933129  | 1.550969  | 3.906635  |
| 43 | 6  | 0 | -8.366900  | 1.530932  | 5.329151  |
| 44 | 6  | 0 | -7.093202  | 2.350805  | 5.511247  |
| 45 | 6  | 0 | -10.656619 | -0.611121 | 0.114418  |
| 46 | 6  | 0 | -11.130036 | 0.697440  | -0.044376 |

|    |    |   |            |           |           |
|----|----|---|------------|-----------|-----------|
| 47 | 6  | 0 | -12.512136 | 0.719696  | -0.160686 |
| 48 | 6  | 0 | -13.109133 | -0.551249 | -0.072114 |
| 49 | 16 | 0 | -11.883947 | -1.801330 | 0.157216  |
| 50 | 6  | 0 | 14.341220  | 0.723447  | -0.107148 |
| 51 | 6  | 0 | 15.216087  | 1.782357  | -0.016793 |
| 52 | 6  | 0 | 14.835079  | 3.190626  | 0.188934  |
| 53 | 6  | 0 | 16.671280  | 1.717841  | -0.084587 |
| 54 | 6  | 0 | 16.090687  | 3.963384  | 0.265279  |
| 55 | 6  | 0 | 17.181361  | 3.096428  | 0.108042  |
| 56 | 6  | 0 | 18.474604  | 3.618582  | 0.150814  |
| 57 | 6  | 0 | 18.630595  | 4.990083  | 0.348843  |
| 58 | 6  | 0 | 17.533667  | 5.839541  | 0.501868  |
| 59 | 6  | 0 | 16.240733  | 5.325063  | 0.460462  |
| 60 | 1  | 0 | 19.350212  | 2.995375  | 0.036765  |
| 61 | 1  | 0 | 19.632933  | 5.402571  | 0.384146  |
| 62 | 1  | 0 | 17.693262  | 6.901416  | 0.653268  |
| 63 | 1  | 0 | 15.365078  | 5.953785  | 0.575799  |
| 64 | 6  | 0 | 17.468192  | 0.611779  | -0.299747 |
| 65 | 6  | 0 | 18.891102  | 0.666584  | -0.346067 |
| 66 | 6  | 0 | 16.962901  | -0.704298 | -0.507012 |
| 67 | 7  | 0 | 20.052867  | 0.664658  | -0.390706 |
| 68 | 7  | 0 | 16.579666  | -1.788831 | -0.680274 |
| 69 | 8  | 0 | 13.706640  | 3.647776  | 0.284765  |
| 70 | 6  | 0 | -14.511396 | -0.679667 | -0.177618 |
| 71 | 6  | 0 | -15.384245 | -1.743113 | -0.130530 |
| 72 | 6  | 0 | -15.010708 | -3.150087 | 0.098129  |
| 73 | 6  | 0 | -16.834616 | -1.683144 | -0.269524 |
| 74 | 6  | 0 | -16.266844 | -3.925231 | 0.119224  |
| 75 | 6  | 0 | -17.350713 | -3.061573 | -0.093216 |
| 76 | 6  | 0 | -18.643544 | -3.586456 | -0.106840 |



|     |   |   |            |           |           |
|-----|---|---|------------|-----------|-----------|
| 77  | 6 | 0 | -18.805907 | -4.956928 | 0.092930  |
| 78  | 6 | 0 | -17.715549 | -5.803084 | 0.301453  |
| 79  | 6 | 0 | -16.423060 | -5.286045 | 0.315753  |
| 80  | 1 | 0 | -19.514293 | -2.966087 | -0.264813 |
| 81  | 1 | 0 | -19.808088 | -5.371199 | 0.084999  |
| 82  | 1 | 0 | -17.879859 | -6.864248 | 0.452748  |
| 83  | 1 | 0 | -15.552430 | -5.912147 | 0.475093  |
| 84  | 6 | 0 | -17.620588 | -0.579840 | -0.531863 |
| 85  | 6 | 0 | -19.039552 | -0.635626 | -0.647720 |
| 86  | 6 | 0 | -17.104664 | 0.734086  | -0.726261 |
| 87  | 7 | 0 | -20.197713 | -0.634528 | -0.749261 |
| 88  | 7 | 0 | -16.710333 | 1.815992  | -0.890687 |
| 89  | 8 | 0 | -13.887415 | -3.605147 | 0.247968  |
| 90  | 1 | 0 | -13.118702 | 1.606065  | -0.299561 |
| 91  | 1 | 0 | 12.939041  | -1.548935 | -0.305466 |
| 92  | 6 | 0 | 9.787152   | -1.607770 | -0.272162 |
| 93  | 6 | 0 | 9.747307   | -2.793003 | 0.728909  |
| 94  | 6 | 0 | -9.977942  | 1.683711  | -0.119868 |
| 95  | 6 | 0 | -9.843998  | 2.216741  | -1.582186 |
| 96  | 6 | 0 | -10.017672 | 2.949597  | 0.800683  |
| 97  | 6 | 0 | -10.357009 | 3.216483  | 2.308823  |
| 98  | 6 | 0 | 9.687890   | -2.175555 | -1.722632 |
| 99  | 1 | 0 | 14.795043  | -0.252675 | -0.235238 |
| 100 | 1 | 0 | 9.516584   | -1.334407 | -2.402471 |
| 101 | 1 | 0 | 8.769303   | -2.773111 | -1.751530 |
| 102 | 1 | 0 | 11.541288  | -3.259020 | -1.397661 |
| 103 | 1 | 0 | 11.201354  | -2.193446 | -4.215486 |
| 104 | 1 | 0 | 11.686334  | -1.142211 | -2.908820 |
| 105 | 1 | 0 | 13.320917  | -3.564508 | -3.825700 |
| 106 | 1 | 0 | 13.685910  | -1.862154 | -4.063548 |

|     |   |   |            |           |           |
|-----|---|---|------------|-----------|-----------|
| 107 | 1 | 0 | 13.704328  | -2.547724 | -2.443752 |
| 108 | 1 | 0 | 9.719019   | -4.774813 | -1.958742 |
| 109 | 1 | 0 | 9.606318   | -4.136057 | -3.576364 |
| 110 | 1 | 0 | 12.271822  | -5.292872 | -2.736719 |
| 111 | 1 | 0 | 10.948801  | -6.411983 | -2.926692 |
| 112 | 1 | 0 | 11.748233  | -4.504922 | -5.164789 |
| 113 | 1 | 0 | 12.406554  | -6.115289 | -4.974143 |
| 114 | 1 | 0 | 10.120085  | -7.104087 | -5.187303 |
| 115 | 1 | 0 | 9.422033   | -5.493460 | -5.359828 |
| 116 | 1 | 0 | 10.516374  | -6.112131 | -6.593944 |
| 117 | 1 | 0 | 8.750187   | -3.236805 | 0.614241  |
| 118 | 1 | 0 | 10.447683  | -3.553388 | 0.367289  |
| 119 | 1 | 0 | 9.726894   | -3.570444 | 2.672658  |
| 120 | 1 | 0 | 12.122924  | -2.695407 | 1.720951  |
| 121 | 1 | 0 | 11.695298  | -1.319941 | 2.700126  |
| 122 | 1 | 0 | 12.773011  | -2.532171 | 4.322560  |
| 123 | 1 | 0 | 11.215471  | -3.295903 | 4.534921  |
| 124 | 1 | 0 | 13.523953  | -4.348376 | 2.834748  |
| 125 | 1 | 0 | 13.097237  | -4.902494 | 4.438475  |
| 126 | 1 | 0 | 11.353428  | -5.240701 | 1.932428  |
| 127 | 1 | 0 | 12.261012  | -6.501097 | 2.760186  |
| 128 | 1 | 0 | 10.882329  | -5.741891 | 3.559269  |
| 129 | 1 | 0 | -9.044811  | 3.430491  | 0.634430  |
| 130 | 1 | 0 | -10.734362 | 3.596442  | 0.282265  |
| 131 | 1 | 0 | -10.312012 | 4.313164  | 2.250670  |
| 132 | 1 | 0 | -9.810065  | 3.432451  | 4.337066  |
| 133 | 1 | 0 | -8.453415  | 3.538900  | 3.250756  |
| 134 | 1 | 0 | -9.775829  | 0.857932  | 3.859240  |
| 135 | 1 | 0 | -8.174908  | 1.160714  | 3.231453  |
| 136 | 1 | 0 | -9.132982  | 1.887426  | 6.030054  |

|     |   |   |            |           |           |
|-----|---|---|------------|-----------|-----------|
| 137 | 1 | 0 | -8.163586  | 0.490732  | 5.607762  |
| 138 | 1 | 0 | -6.309616  | 2.017508  | 4.823131  |
| 139 | 1 | 0 | -7.262914  | 3.415335  | 5.328380  |
| 140 | 1 | 0 | -6.702984  | 2.253878  | 6.527875  |
| 141 | 1 | 0 | -12.467839 | 3.055407  | 1.867386  |
| 142 | 1 | 0 | -12.097015 | 3.826593  | 3.382723  |
| 143 | 1 | 0 | -11.681969 | 1.727791  | 4.527440  |
| 144 | 1 | 0 | -13.257734 | 1.713466  | 3.748508  |
| 145 | 1 | 0 | -11.927604 | 0.798903  | 3.050651  |
| 146 | 1 | 0 | -9.623610  | 1.362813  | -2.230873 |
| 147 | 1 | 0 | -8.944509  | 2.843153  | -1.598296 |
| 148 | 1 | 0 | -11.741667 | 3.244175  | -1.349797 |
| 149 | 1 | 0 | -9.982428  | 4.844195  | -1.910336 |
| 150 | 1 | 0 | -9.741139  | 4.105000  | -3.477715 |
| 151 | 1 | 0 | -11.929242 | 4.917904  | -4.253981 |
| 152 | 1 | 0 | -12.343602 | 5.478743  | -2.642689 |
| 153 | 1 | 0 | -10.440943 | 7.098454  | -2.726642 |
| 154 | 1 | 0 | -10.008008 | 6.517919  | -4.321561 |
| 155 | 1 | 0 | -12.676388 | 7.865270  | -3.607180 |
| 156 | 1 | 0 | -11.345053 | 8.623026  | -4.485214 |
| 157 | 1 | 0 | -12.236572 | 7.284897  | -5.214227 |
| 158 | 1 | 0 | -11.272952 | 2.146211  | -4.134699 |
| 159 | 1 | 0 | -11.743050 | 1.081538  | -2.831471 |
| 160 | 1 | 0 | -13.732228 | 1.712060  | -4.077129 |
| 161 | 1 | 0 | -13.846196 | 2.363911  | -2.447115 |
| 162 | 1 | 0 | -13.464425 | 3.426292  | -3.793220 |
| 163 | 1 | 0 | -14.965016 | 0.293622  | -0.327339 |
| 164 | 1 | 0 | 9.373739   | -0.558994 | 2.490773  |
| 165 | 1 | 0 | 8.073084   | -1.728827 | 2.545006  |
| 166 | 1 | 0 | 8.866335   | -2.480435 | 4.830468  |

|     |   |   |           |           |           |
|-----|---|---|-----------|-----------|-----------|
| 167 | 1 | 0 | 10.108442 | -1.224382 | 4.787133  |
| 168 | 1 | 0 | 8.405414  | -0.778144 | 4.774785  |
| 169 | 6 | 0 | -3.324392 | -1.777333 | 0.136168  |
| 170 | 6 | 0 | -2.876732 | -0.465475 | 0.131862  |
| 171 | 6 | 0 | -1.485320 | -0.150040 | 0.125235  |
| 172 | 6 | 0 | -0.587780 | -1.250113 | 0.131817  |
| 173 | 6 | 0 | -1.059761 | -2.654034 | 0.141111  |
| 174 | 6 | 0 | -0.959322 | 1.145596  | 0.109531  |
| 175 | 6 | 0 | 0.782153  | -1.040286 | 0.125754  |
| 176 | 6 | 0 | 1.308121  | 0.255275  | 0.109544  |
| 177 | 6 | 0 | 0.410749  | 1.355365  | 0.100229  |
| 178 | 6 | 0 | 0.883478  | 2.758862  | 0.076224  |
| 179 | 6 | 0 | 3.148078  | 1.881232  | 0.071107  |
| 180 | 6 | 0 | 2.699434  | 0.569918  | 0.095223  |
| 181 | 1 | 0 | -1.601281 | 2.019833  | 0.100642  |
| 182 | 1 | 0 | 1.424128  | -1.914532 | 0.130528  |
| 183 | 7 | 0 | 2.261349  | 2.942504  | 0.069307  |
| 184 | 7 | 0 | -2.437371 | -2.838266 | 0.139023  |
| 185 | 8 | 0 | 0.114059  | 3.710004  | 0.064734  |
| 186 | 6 | 0 | -2.946555 | -4.198441 | 0.144216  |
| 187 | 6 | 0 | 2.770601  | 4.302519  | 0.049159  |
| 188 | 1 | 0 | 3.433497  | 4.472630  | 0.900754  |
| 189 | 1 | 0 | 3.314722  | 4.496447  | -0.879017 |
| 190 | 1 | 0 | 1.913637  | 4.968564  | 0.112129  |
| 191 | 1 | 0 | -2.086954 | -4.864058 | 0.147956  |
| 192 | 1 | 0 | -3.552293 | -4.376499 | 1.036340  |
| 193 | 1 | 0 | -3.550499 | -4.384379 | -0.747494 |
| 194 | 8 | 0 | -0.290076 | -3.604960 | 0.148107  |
| 195 | 6 | 0 | -4.736015 | -1.883900 | 0.130789  |
| 196 | 6 | 0 | -5.362612 | -0.656421 | 0.129059  |

|     |    |   |           |           |           |
|-----|----|---|-----------|-----------|-----------|
| 197 | 16 | 0 | -4.204518 | 0.645684  | 0.137711  |
| 198 | 6  | 0 | 4.559636  | 1.986013  | 0.039539  |
| 199 | 6  | 0 | 5.184829  | 0.757635  | 0.047524  |
| 200 | 16 | 0 | 4.025980  | -0.542553 | 0.097901  |
| 201 | 1  | 0 | 5.101698  | 2.920816  | -0.003569 |
| 202 | 1  | 0 | -5.277044 | -2.820208 | 0.118857  |

-----

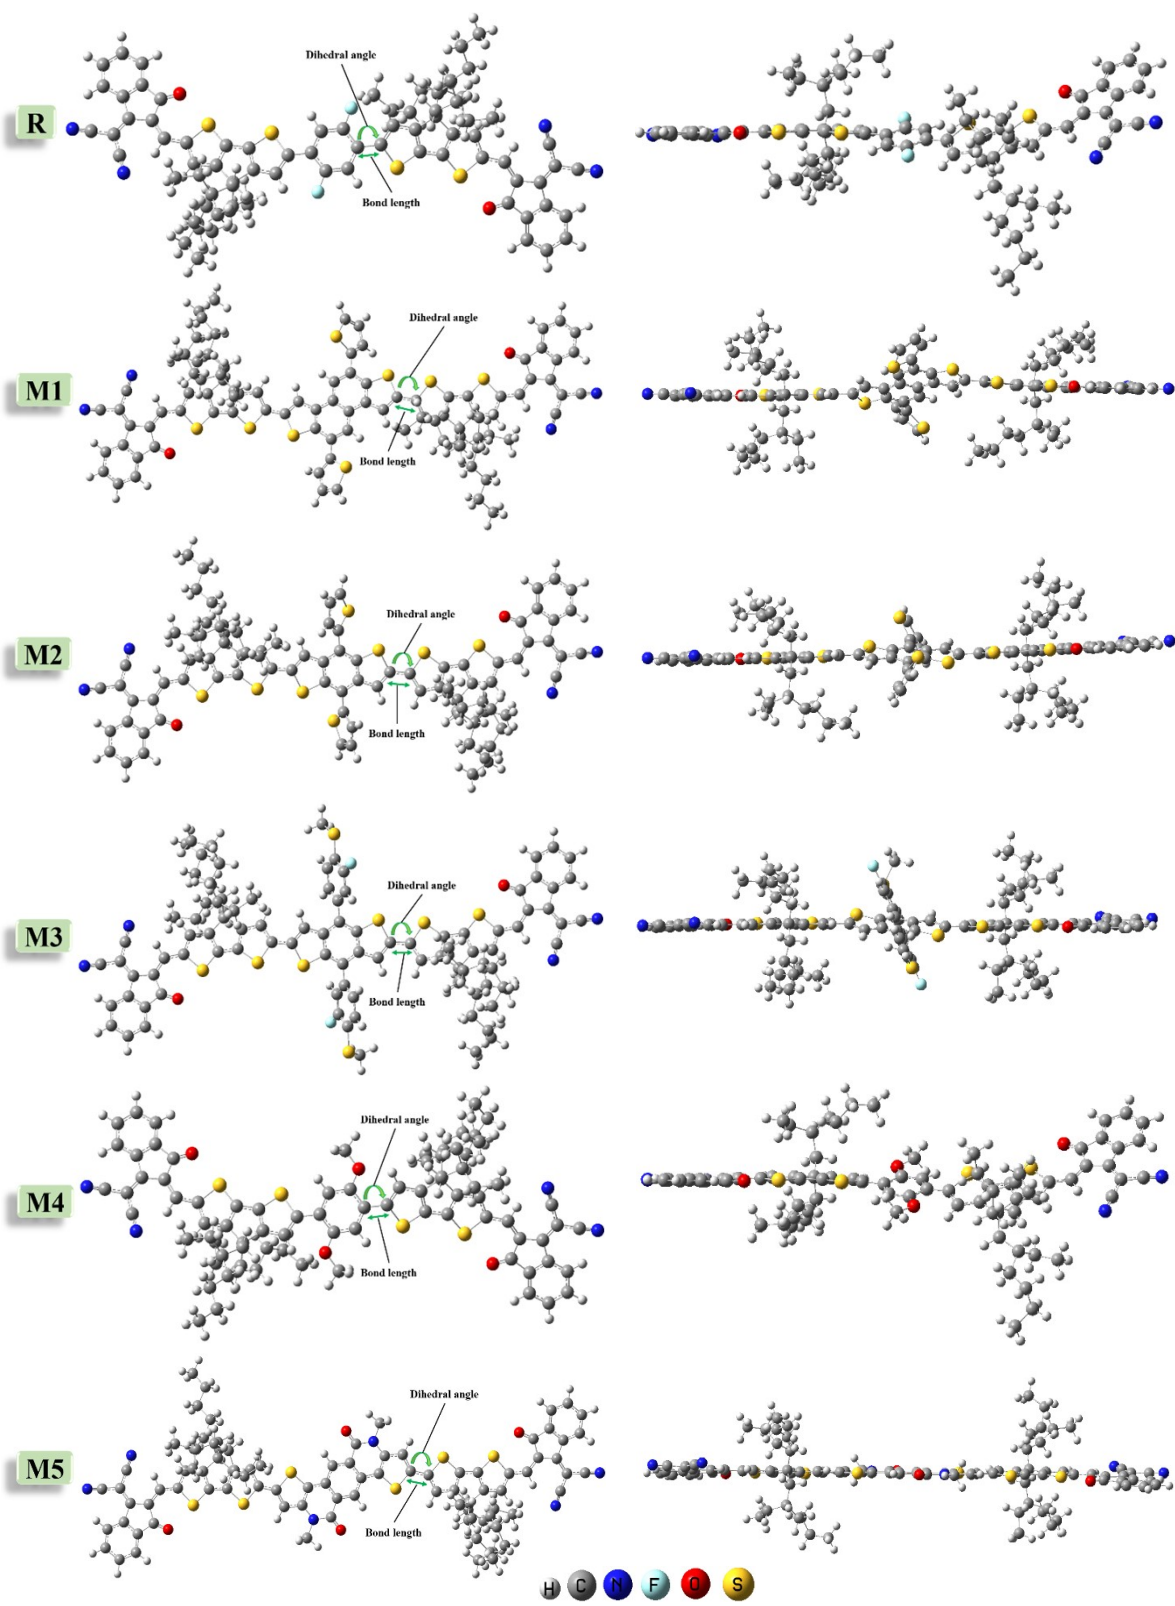

Fig. S1. Optimized molecular structures of reference and modified molecules.

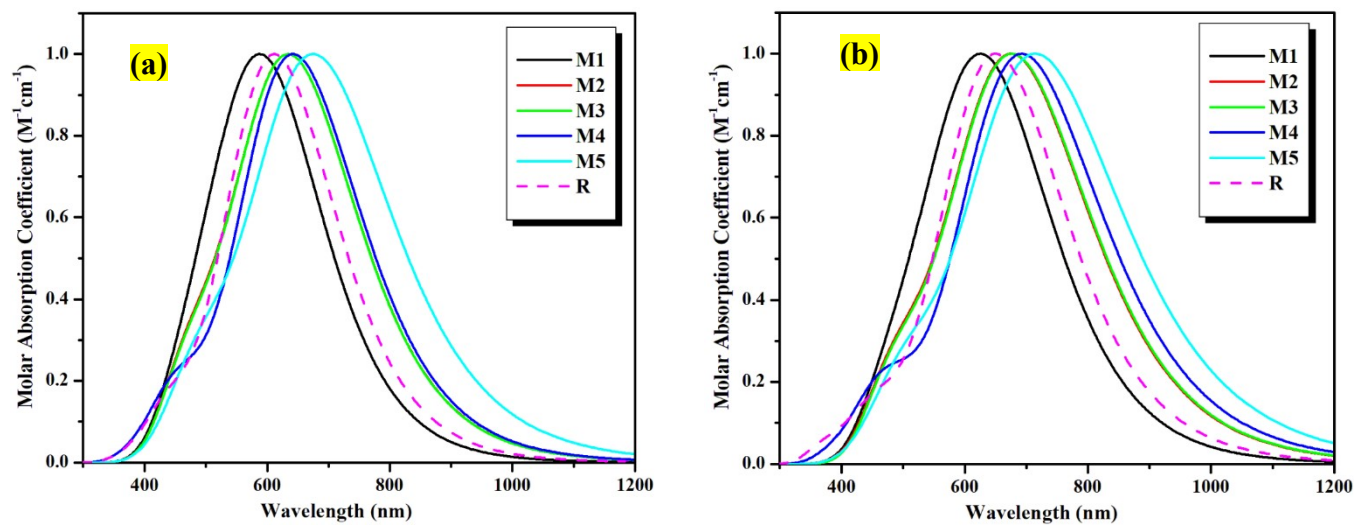

**Fig. S2.** Graphs representing absorption of **R** and **M1-M5** in **(a)** gas phase and **(b)** solvent phase (chloroform).

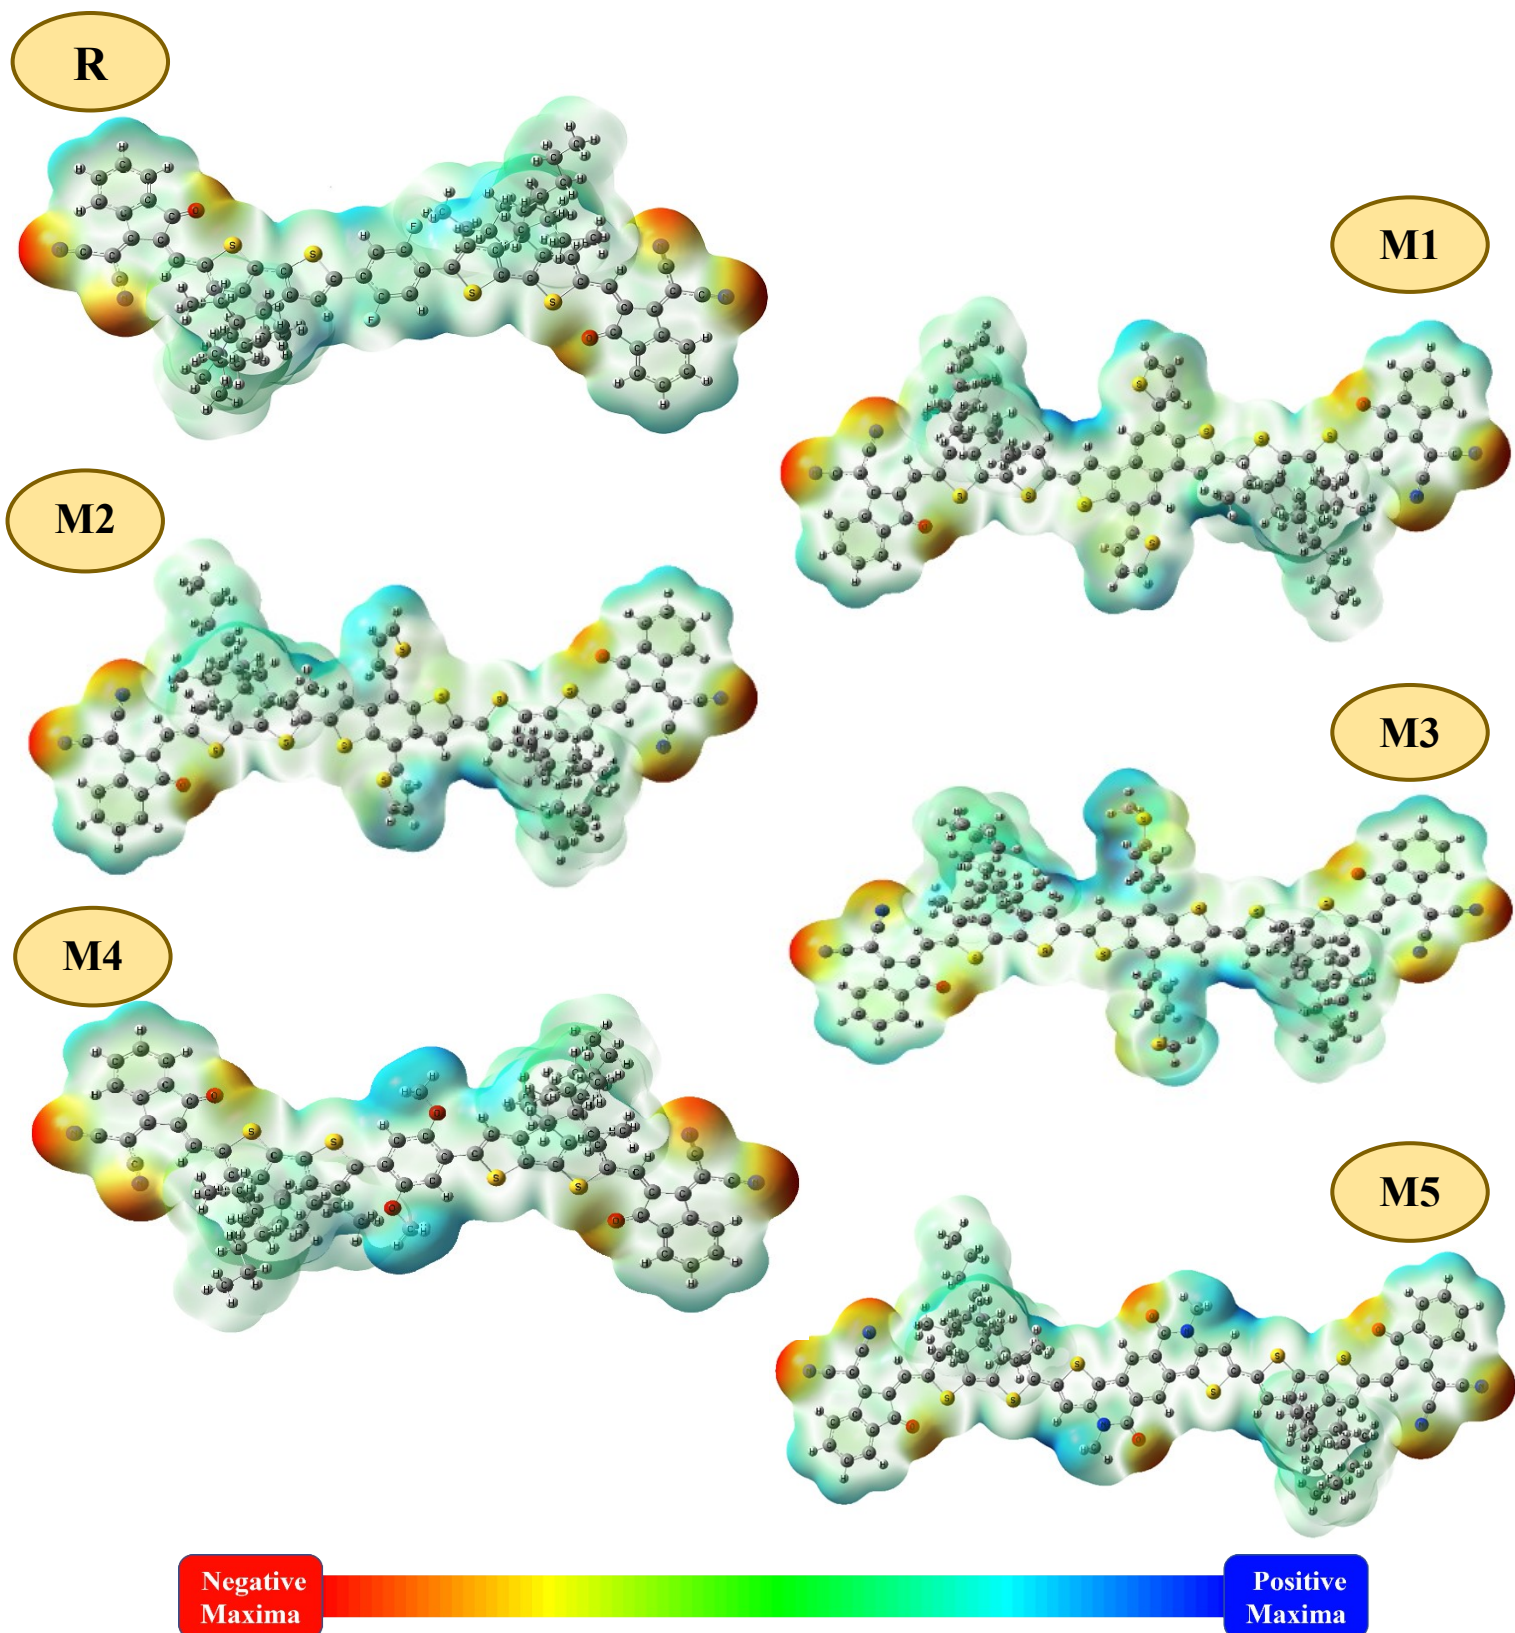

Fig. S3. Shaded maps of MEP for R and M1-M5.



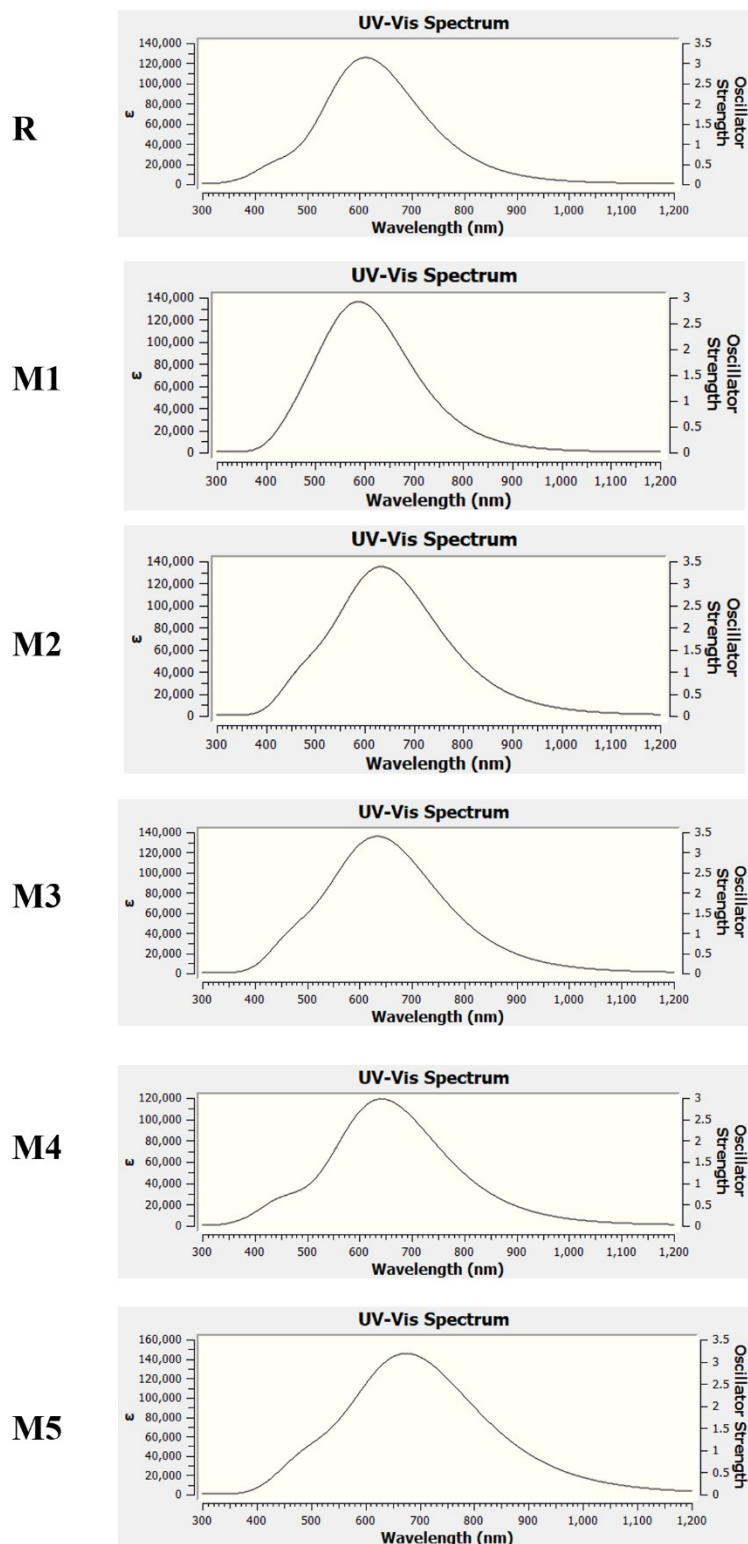

**Figure S4:** Guassview absorption curves of all the molecules in the gas phase phase at MPW1PW91/6-31G (d, p) showing their oscillator strength (right y-axis), molar absorptivity (left y-axis) and wavelength (x-axis).

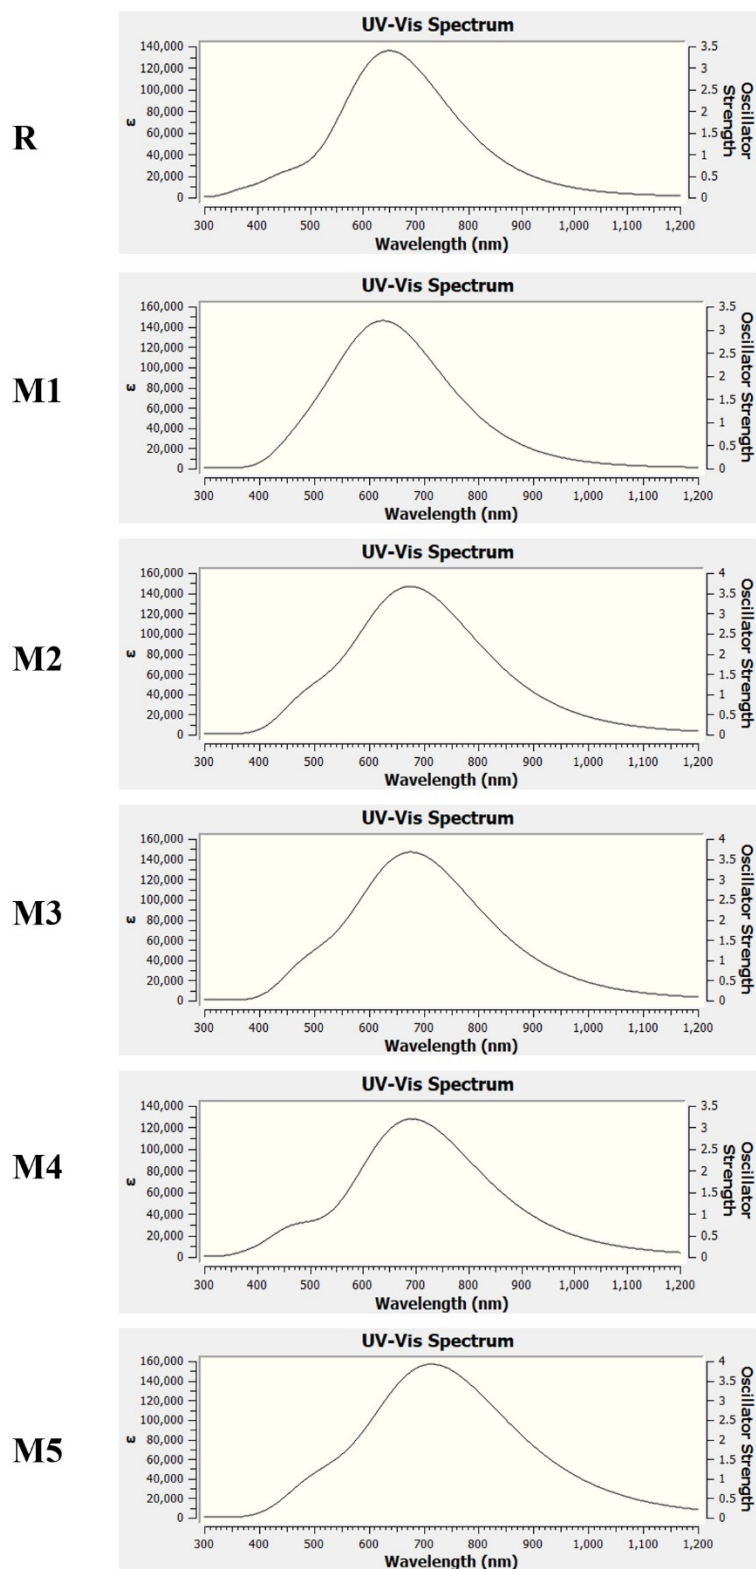

**Figure S5:** Guassview absorption curves of all the molecules in the solvent phase at MPW1PW91/6-31G (d, p) showing their oscillator strength (right y-axis), molar absorptivity (left y-axis) and wavelength (x-axis).

## References

1. Wang, N., et al., *Enhancement of intra-and inter-molecular  $\pi$ -conjugated effects for a non-fullerene acceptor to achieve high-efficiency organic solar cells with an extended photoresponse range and optimized morphology*. Materials Chemistry Frontiers, 2018. **2**(11): p. 2006-2012.
2. Li, S., et al., *An unfused-core-based nonfullerene acceptor enables high-efficiency organic solar cells with excellent morphological stability at high temperatures*. Advanced Materials, 2018. **30**(6): p. 1705208.
